# Supplementary material for: Sequencing and de novo assembly of a near complete indica rice genome
Source: PubMed Central journal article supplement (PMC5418594; doi:10.1038/ncomms15324), 2017-05-04
Supplement: ncomms15324-s1.pdf [file ncomms15324-s1.pdf]

## Supplementary Figures

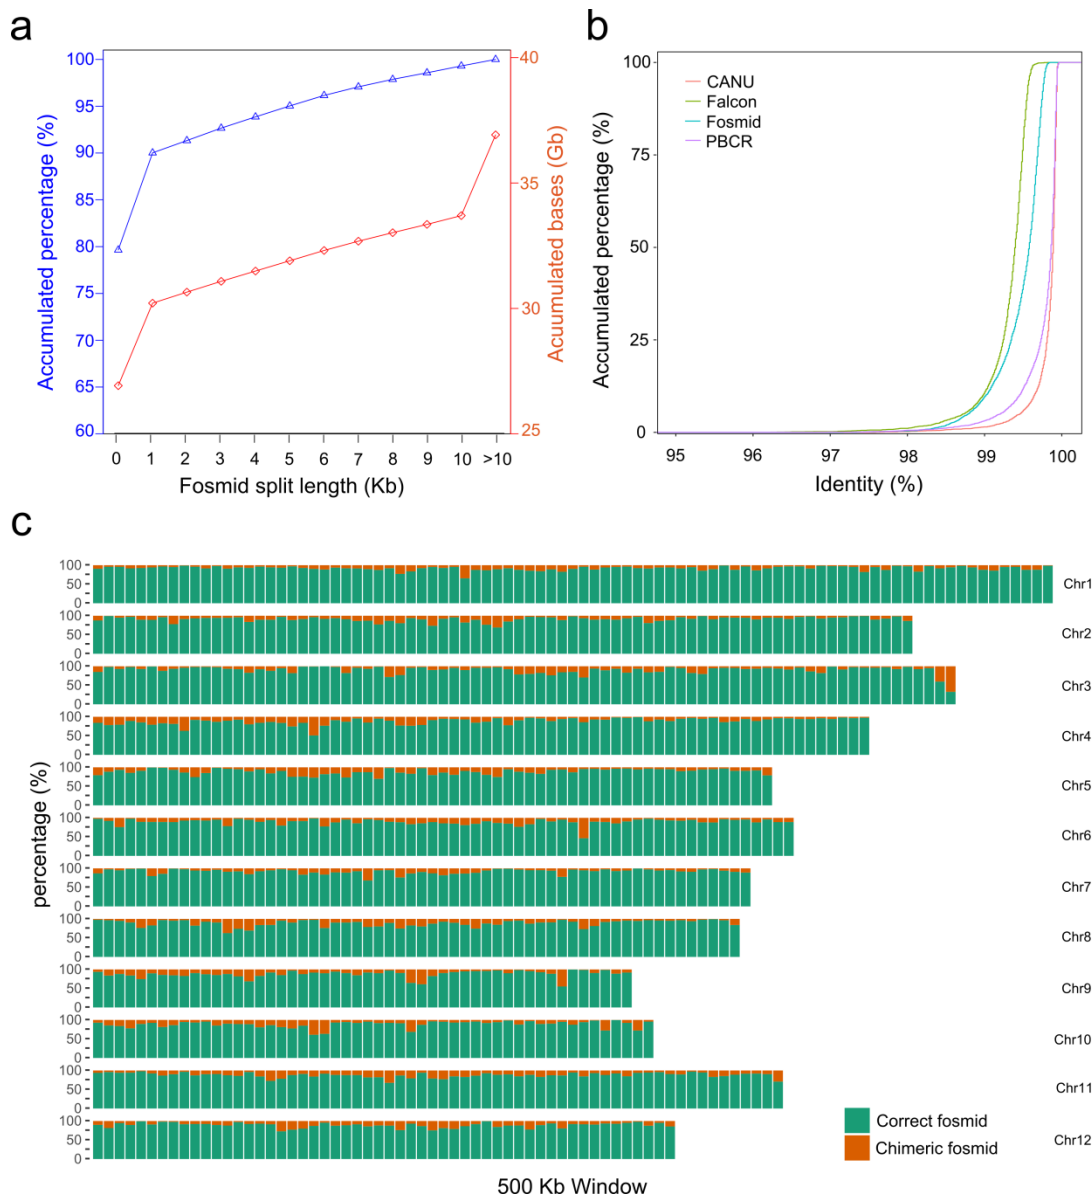

**Supplementary Figure 1: Quality assessment of the fosmid contigs.** All the fosmid contigs were aligned to the assembled genome by BWA with minimum sequence alignment identity of 97%. **(a)** The x-axis indicates the overhang length (chimeric portion) of a fosmid. The left y-axis indicates the number of contigs under each overhang threshold; the right y-axis indicates the accumulated length of the fosmid contigs under each overhang threshold. More than 95% of the aligned fosmid contigs (>80x genome coverage) have overhang length <5 kb, which is below the minimum overlap length used for connections (ie, not leading to chimeric connections). **(b)** Comparison of the base accuracy distribution of fosmid contigs to that of WGS contigs with the pseudomolecules as reference. **(c)** Distribution of the correct and chimeric fosmid contigs throughout the genome. Each vertical bar represents a 500 kb window.

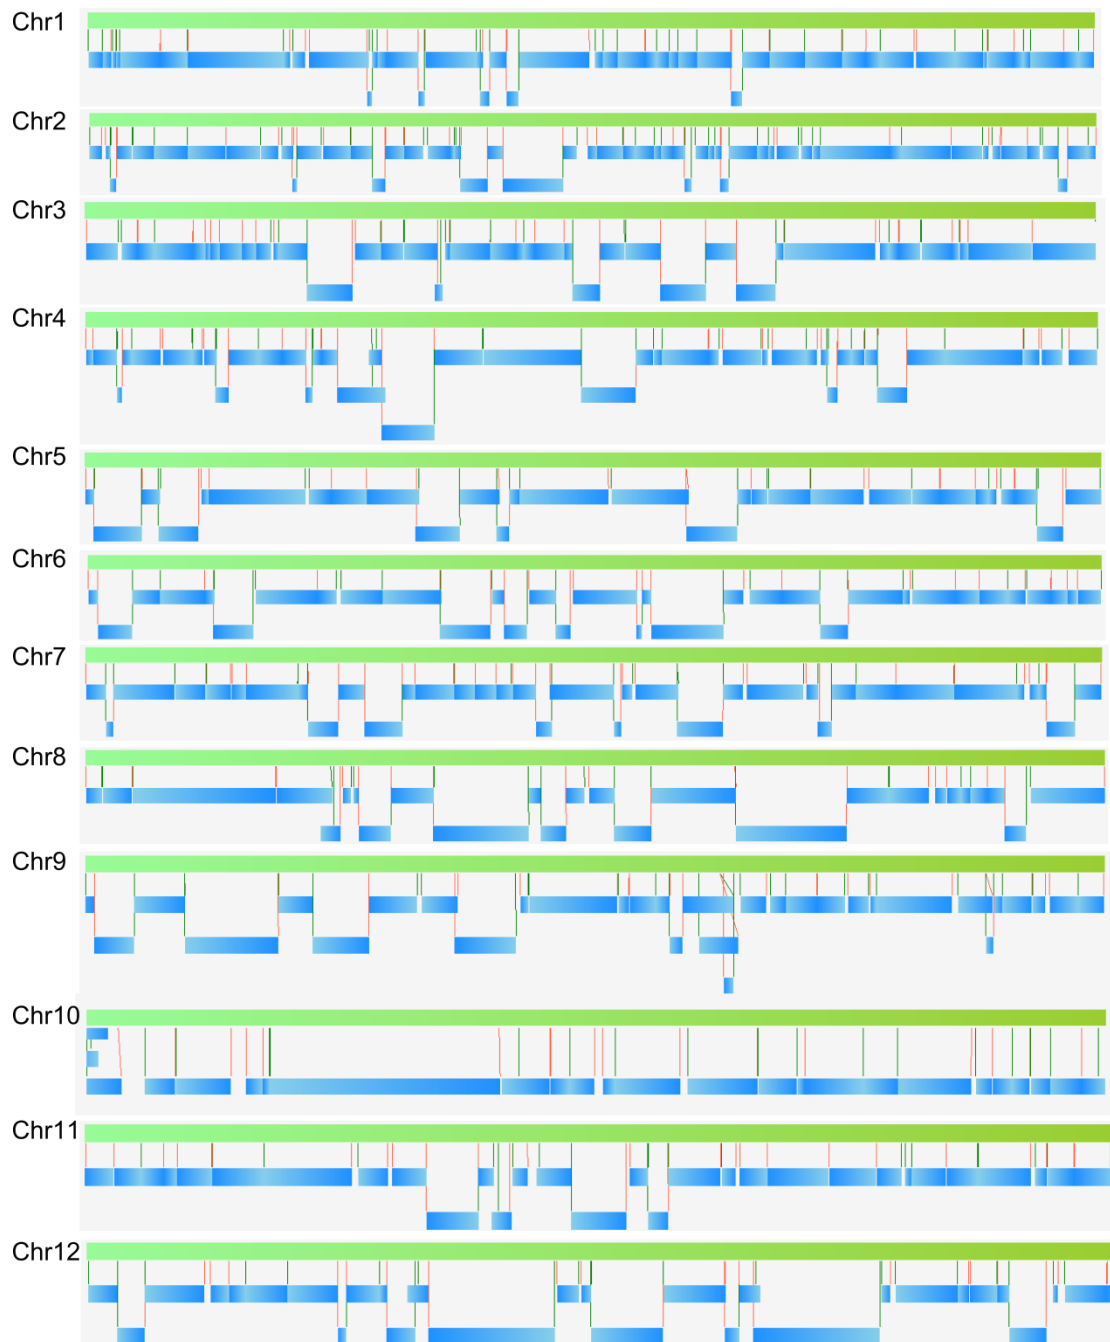

**Supplementary Figure 2: Overview of the comparison of all R498 pseudomolecules to genome maps.** Each green horizontal bar represents an assembled pseudomolecule. Each blue horizontal bar represents a genome map. The vertical lines represent their matching boundaries. Multiple genome maps assembled from tandem repeats were aligned to the middle of chromosome 9 and the beginning of chromosome 10.

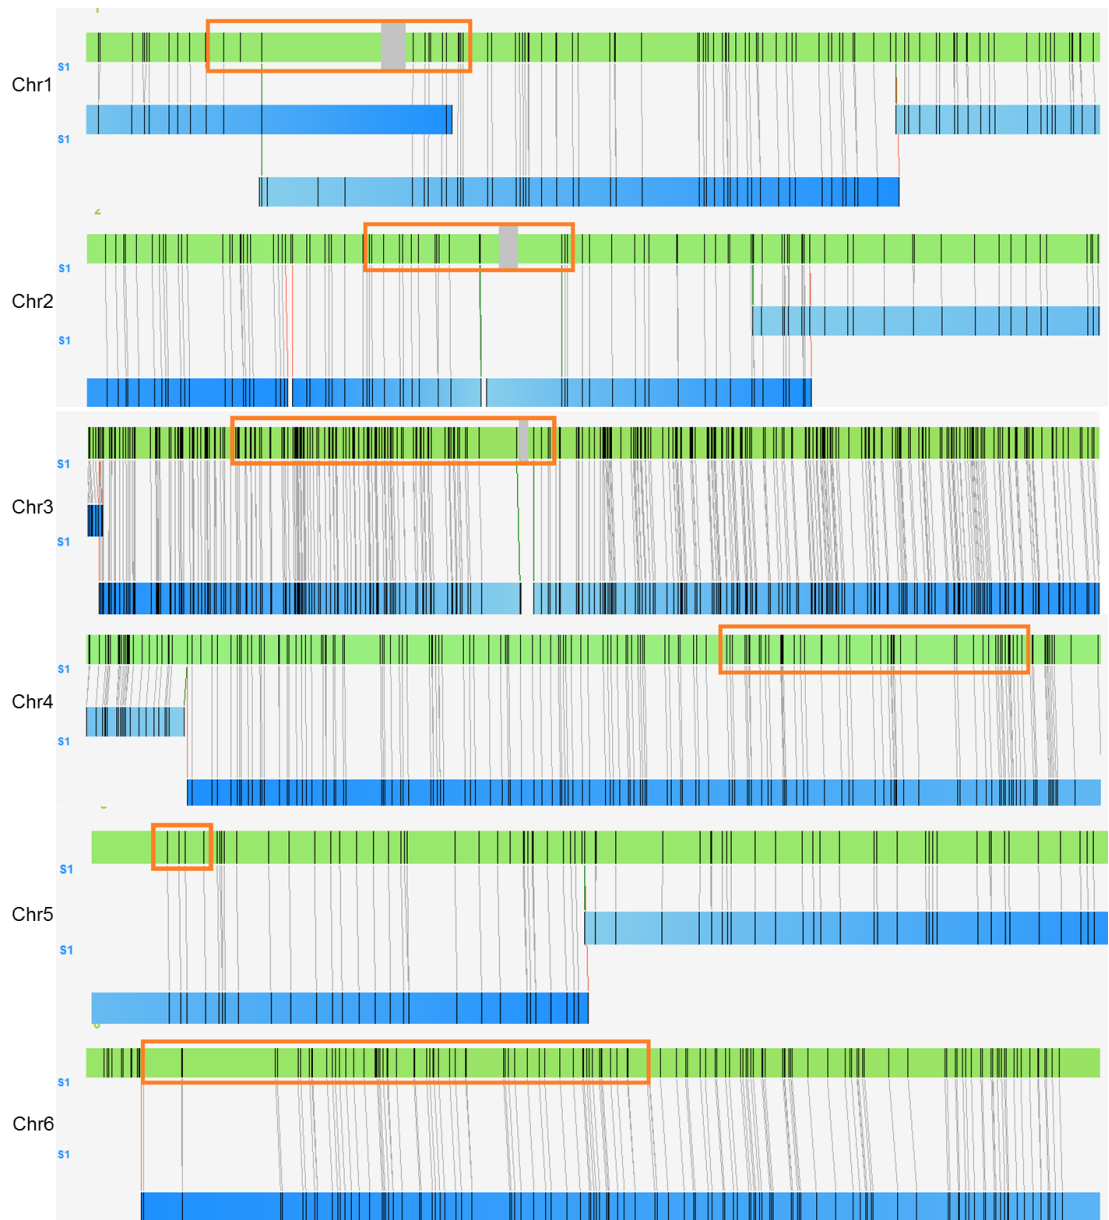

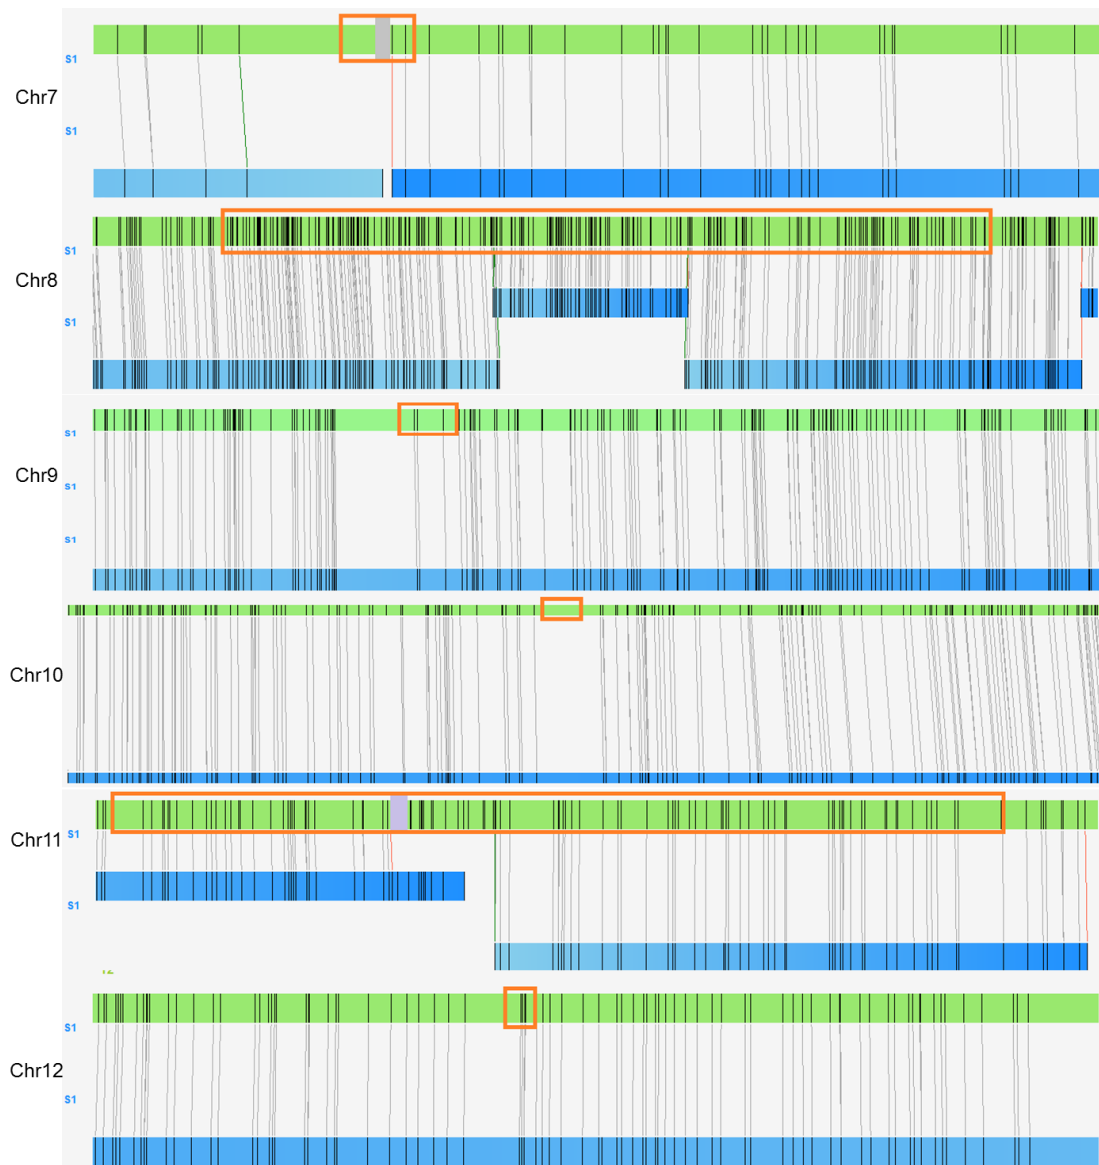

**Supplementary Figure 3: Comparison of all the assembled R498 centromere regions with genome maps.** The green horizontal bars represent pseudomolecules. The blue horizontal bars represent genome maps. The vertical lines represent their matching nicking sites. Red-lined rectangles represent centromere regions (containing all the full units of rice centromere tandem repeats RCS2; see Supplementary Table 9 for their starting and ending positions), and gray boxes represent gaps. None of the five gaps was completely covered by a single map. Therefore, their sizes could not be estimated.

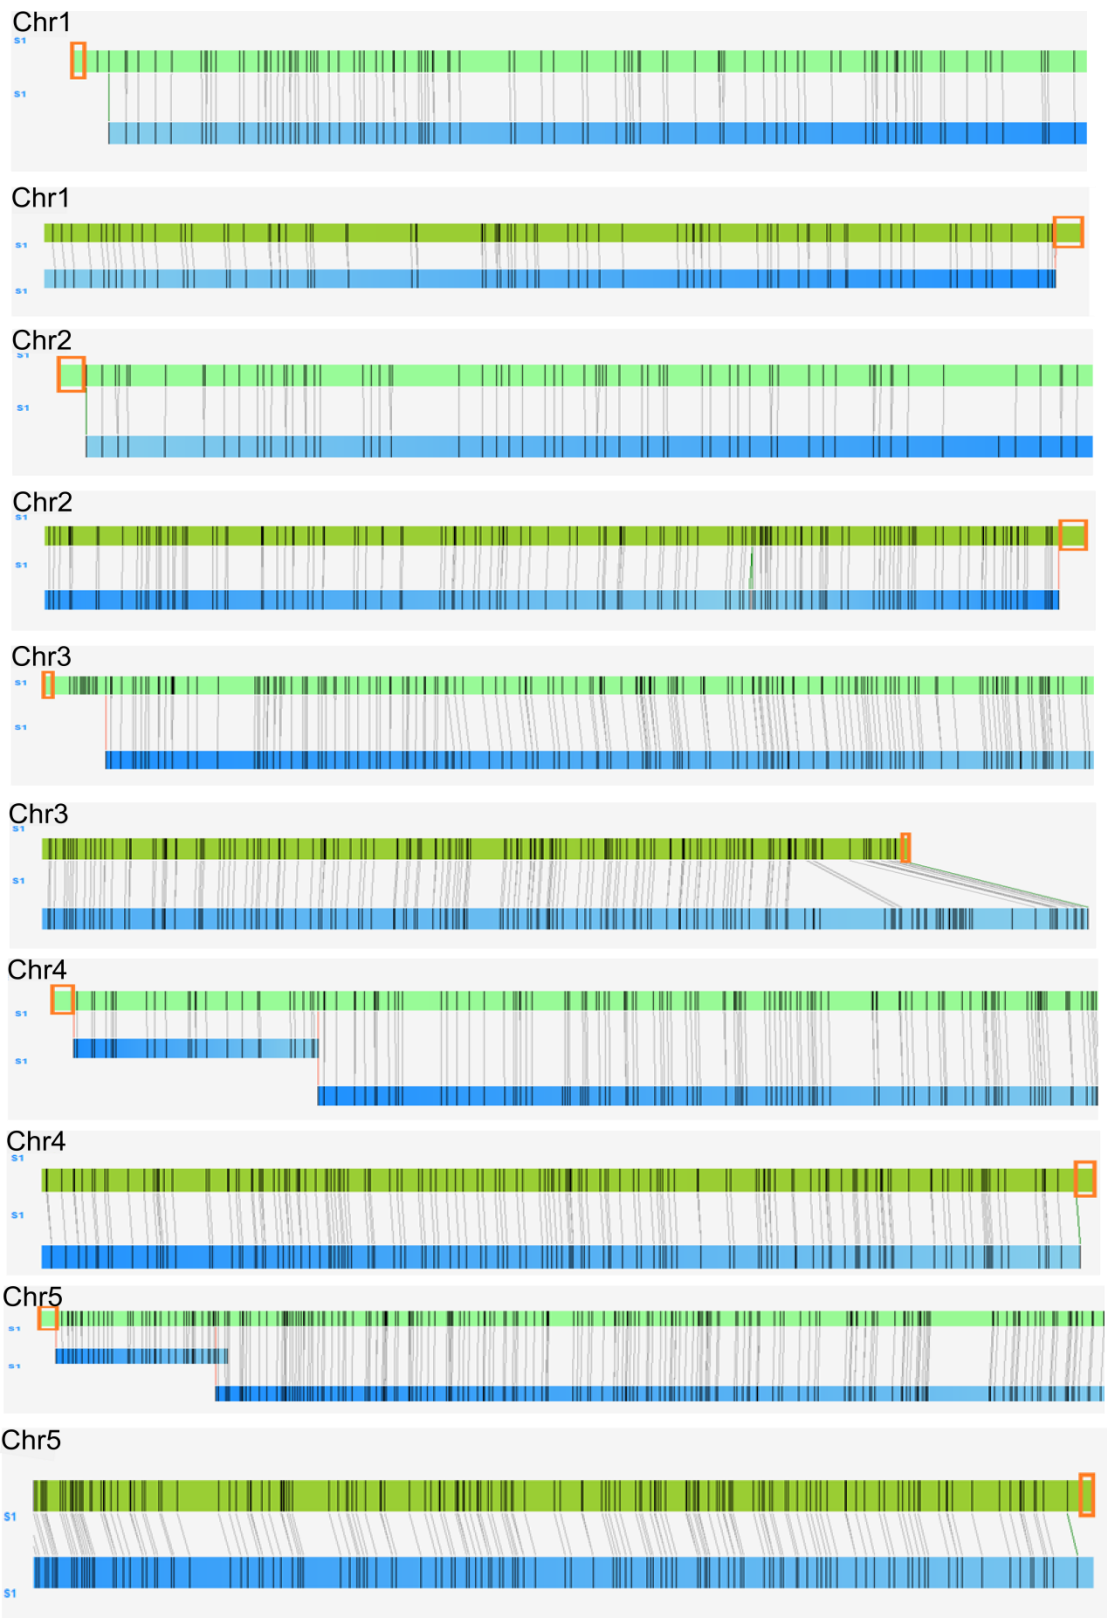

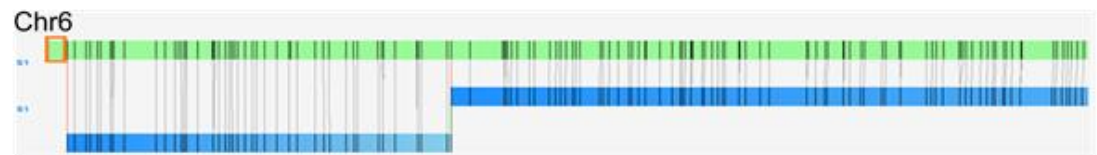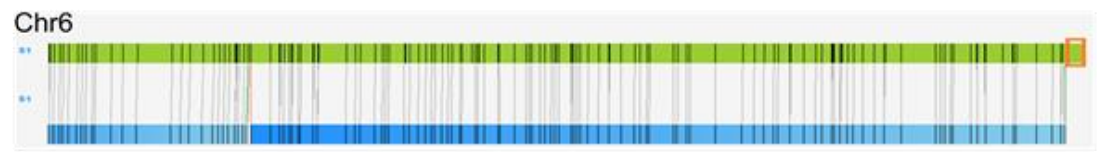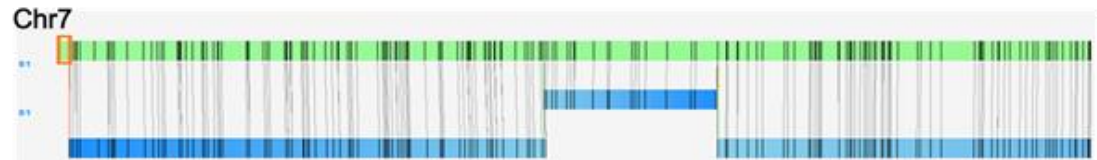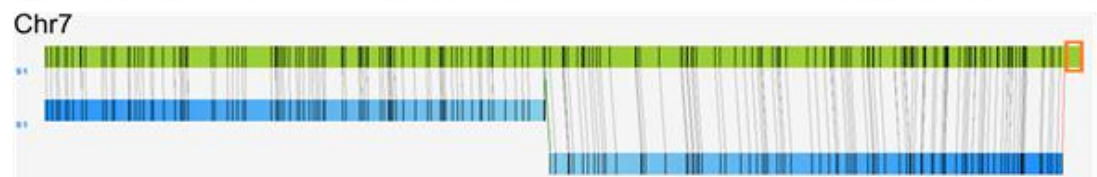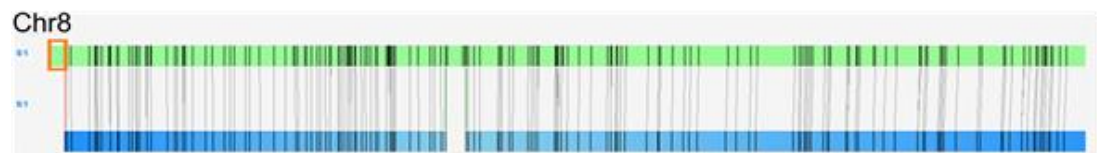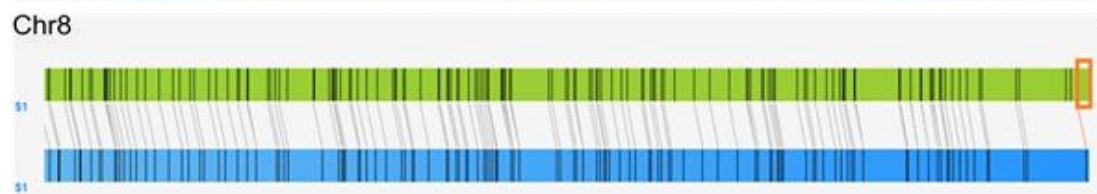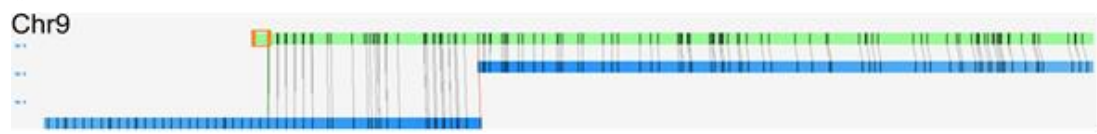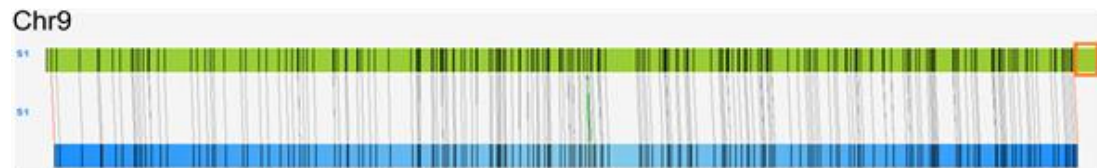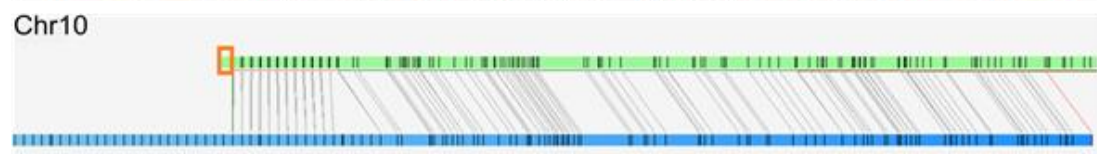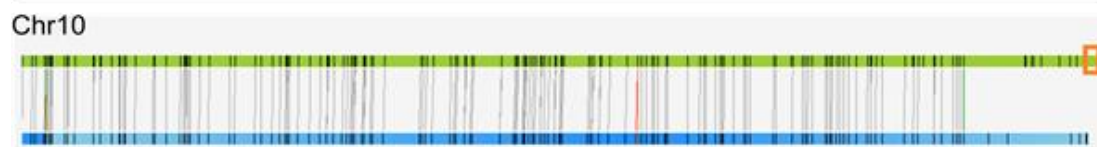

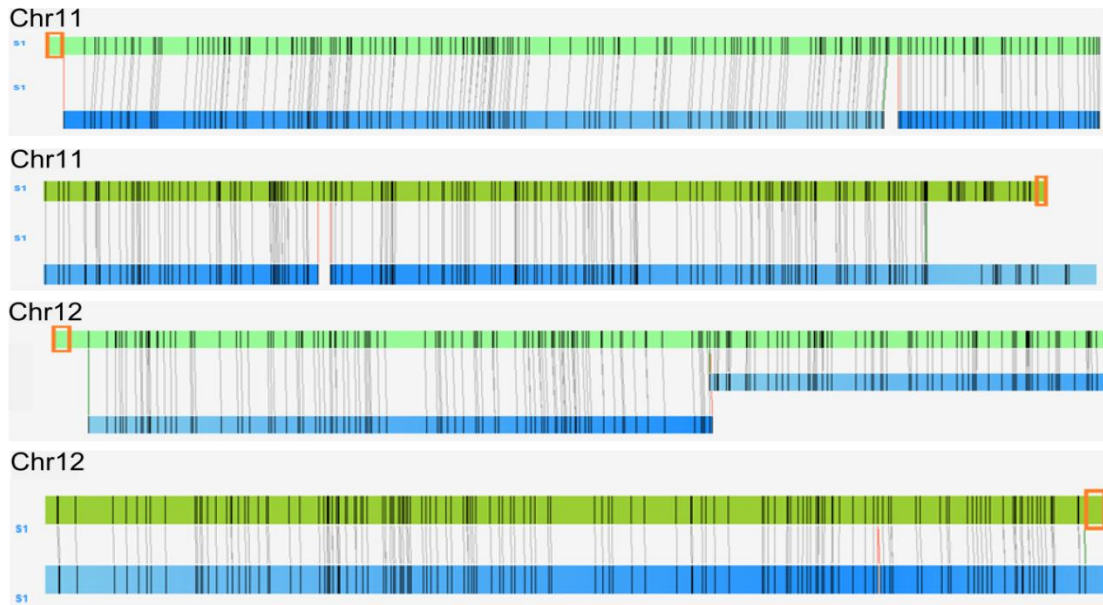

Multiple rDNA maps aligned to the start of chromosome 10

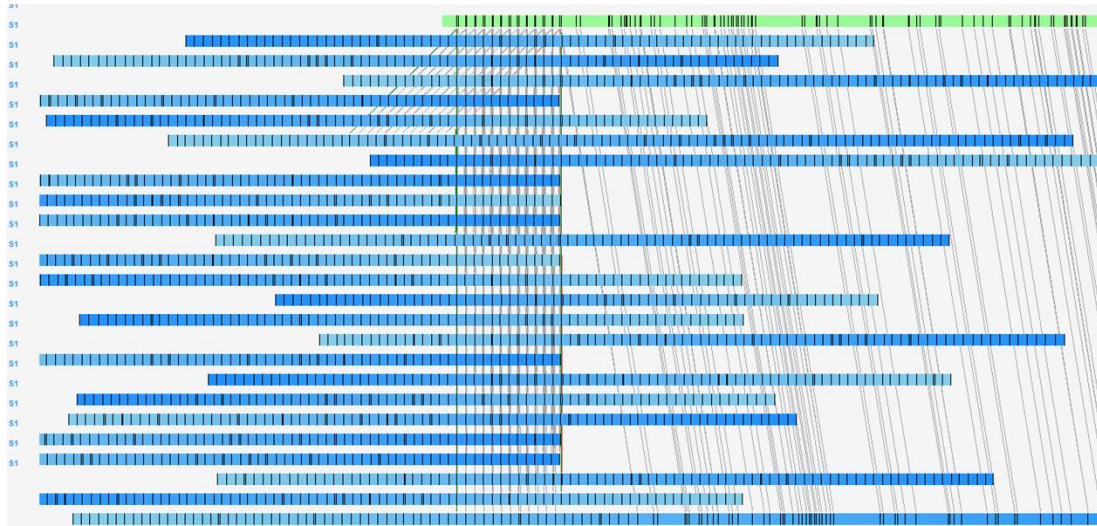

Nip Chr3 right end

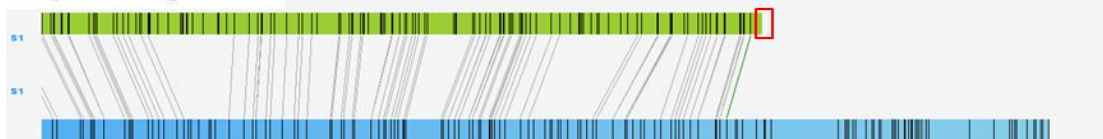

**Supplementary Figure 4: Comparison of R498 chromosomal ends and Nip chromosome 3 distal ends with R498 genome maps.** Red-lined rectangles indicate telomere repeats. The rDNAs are located at the beginning of the chromosomes 9 and 10 (multiple rDNA maps are aligned to chromosome 10). The comparison of R498 genome map to the distal end of chromosome 3 in Nip shows the incomplete end of Nip chromosome 3, missing the corresponding region in R498 which includes the two deletions.

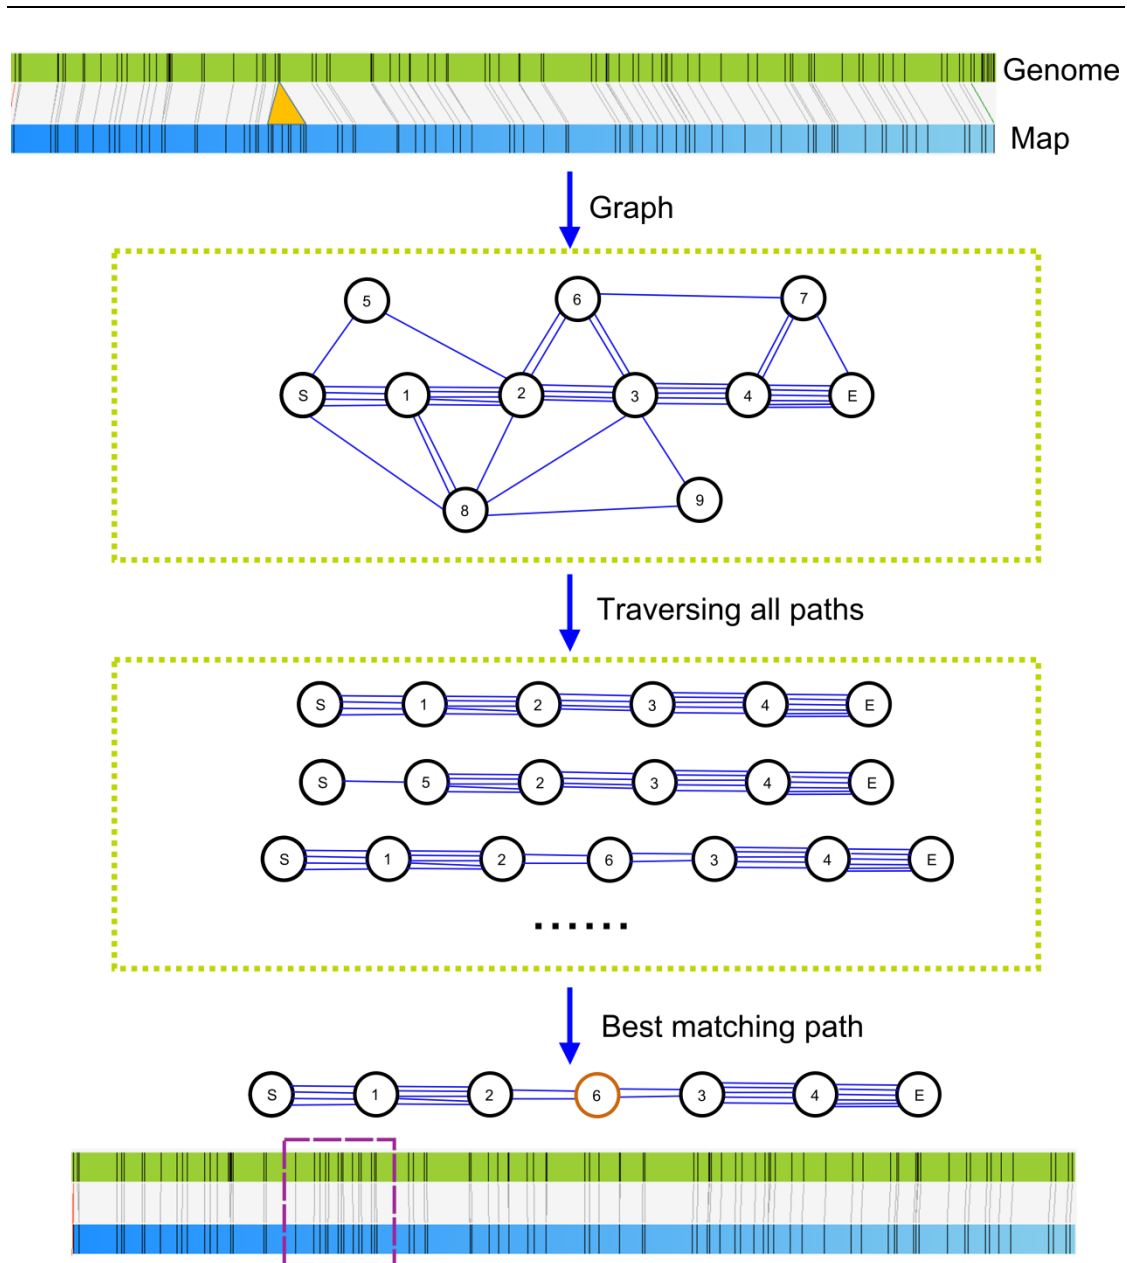

**Supplementary Figure 5: Correction of indels in the super-contigs.** A deletion was found in the assembled sequences (orange on top). The region on overlap graph is shown in the middle. The blue lines represent fosmid contigs and the numbered circles represent WGS contigs. This overlap graph contains many alternative paths in a repetitive region, of which a wrong path was selected initially. Under the guidance of genome maps a new path with the correct length and corresponding nicking sites is selected to fix the error. S and E represent the starting and ending WGS contigs  $\geq 100$  kb that are nearest to the indel in the region, respectively. The purple dashed box at the bottom represents the region after error correction with matching length and nicking sites. See Supplementary Table 13 for a list of corrected regions with changed WGS contigs.



**A**

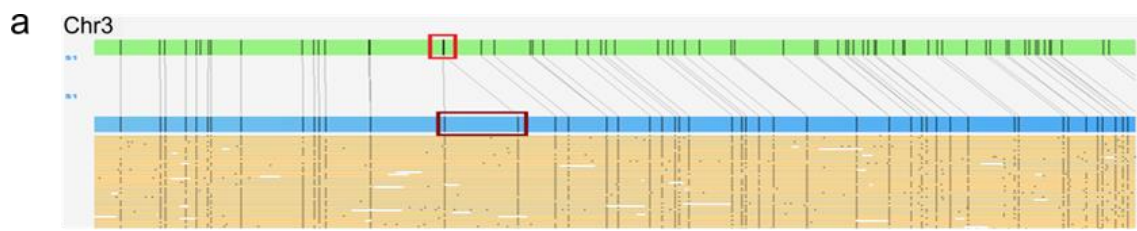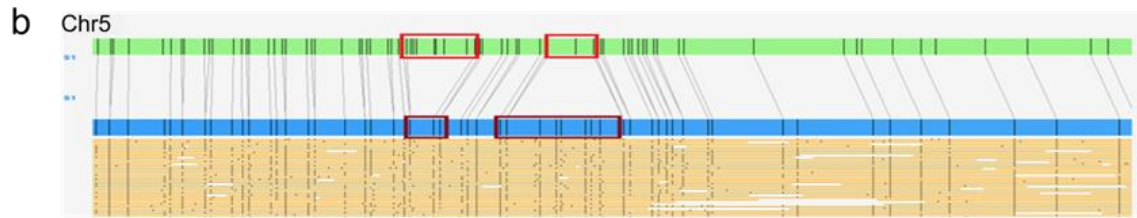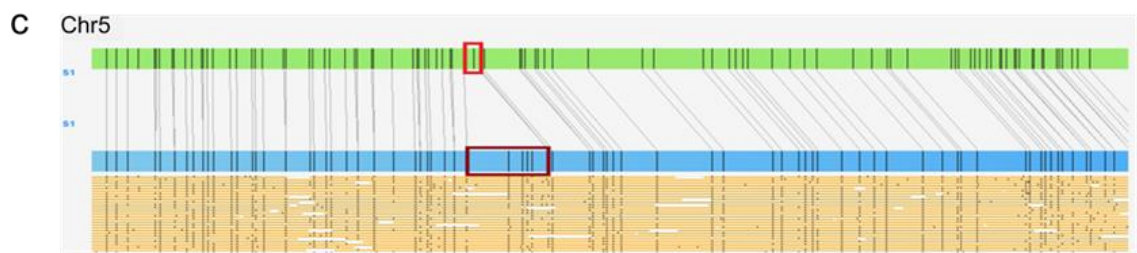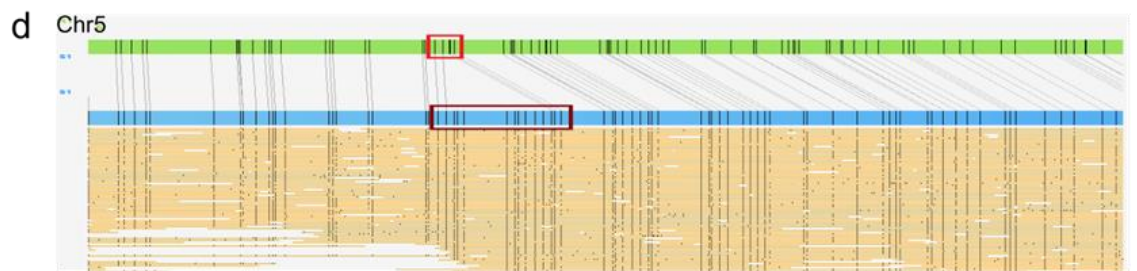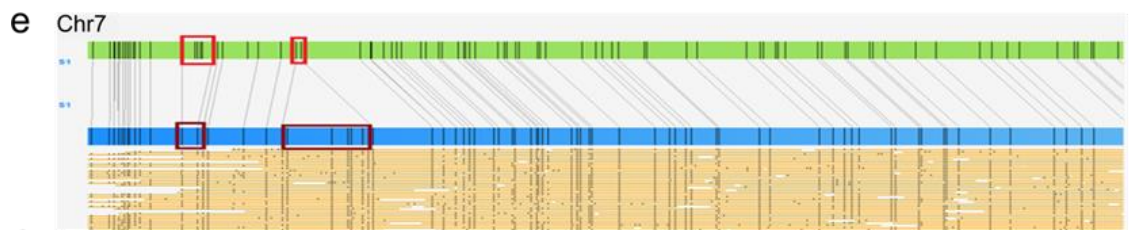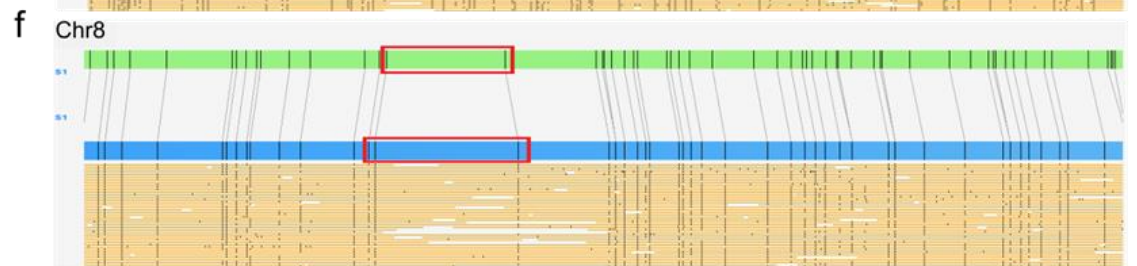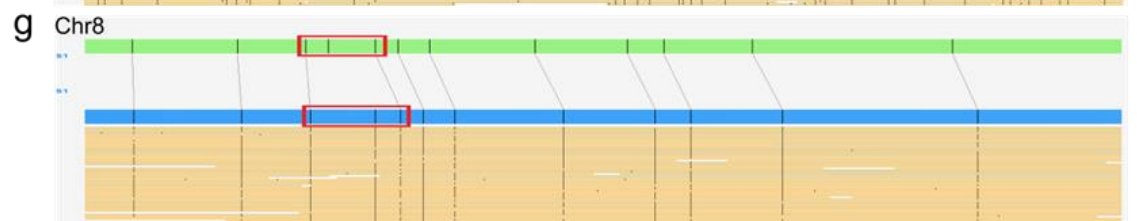

## A (continue)

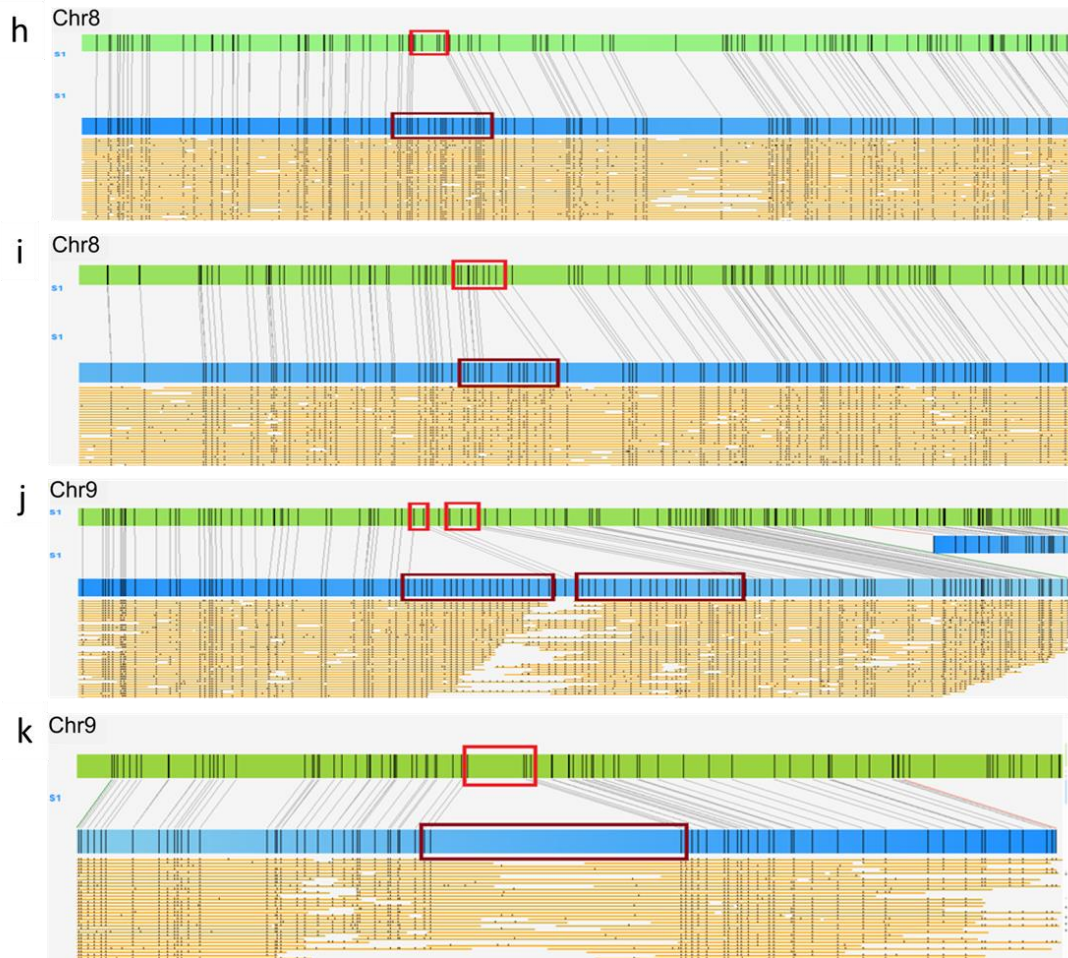

**B**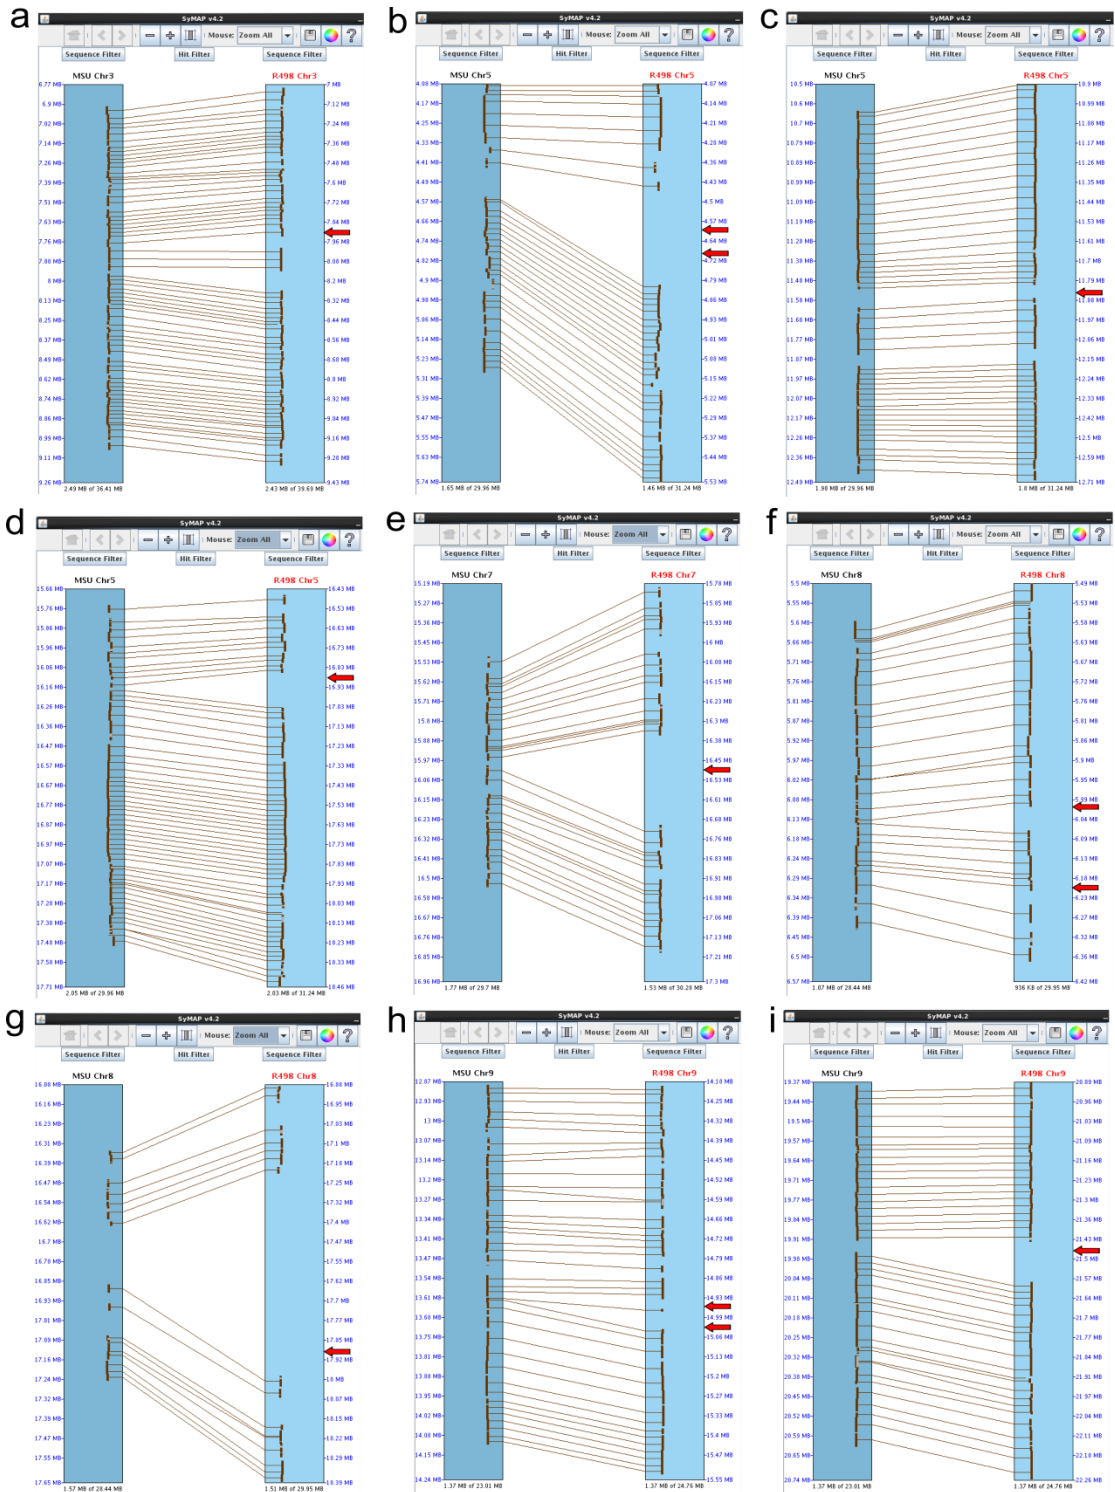

**Supplementary Figure 6: The potential error-prone regions compared to genome maps.** See Supplementary Table 3 for their positions on pseudomolecules. **(A)** Comparison of R498 pseudomolecules to genome maps to show indels. **(B)** Synteny between R498 and Nip in the regions around the indels in **(A)**. Red arrows indicate the location of each indel.

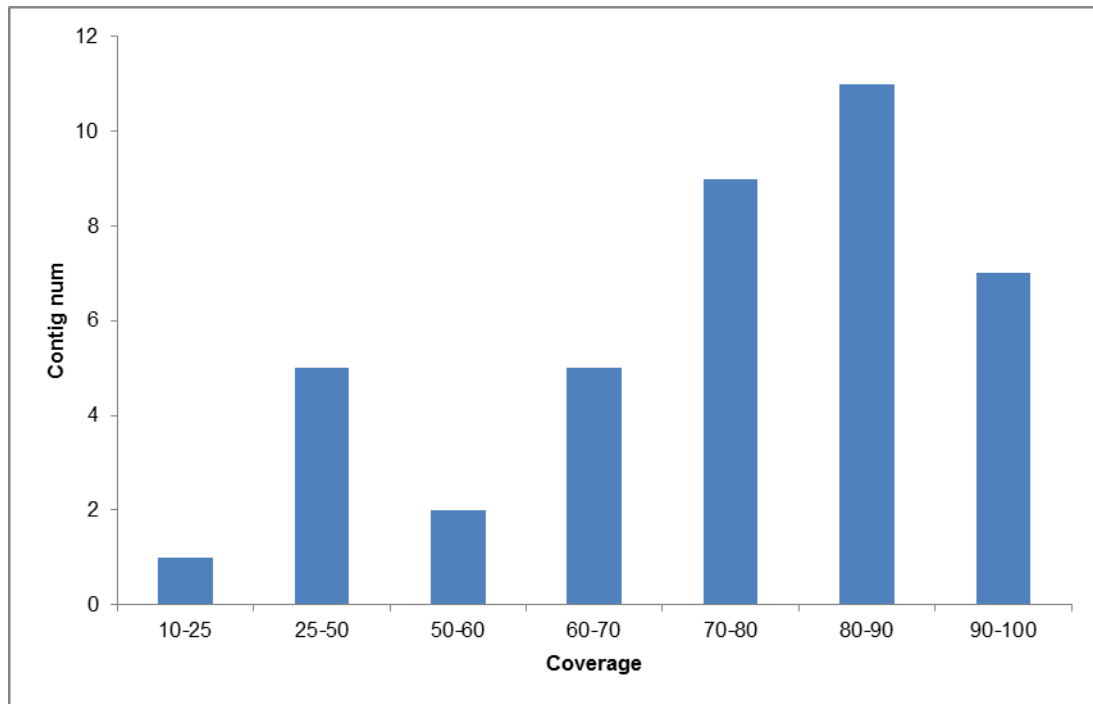

**Supplementary Figure 7: Quality assessment of the unclassified PBcR HS contigs using Illumina short reads.** The x-axis indicates the sequence mapping coverage (%) of the contigs by Illumina short reads. The unclassified contigs have much lower sequence coverage than the pseudomolecules (99.94%) by Illumina short reads. Aligned SMRT reads to these contigs were retrieved and assembled into 419.8 kb of sequences. Of them 415.1 kb (98.88%) were aligned to the assembled R498, including a cpDNA contig of 159.6 kb and an mtDNA contig of 43.7 kb.

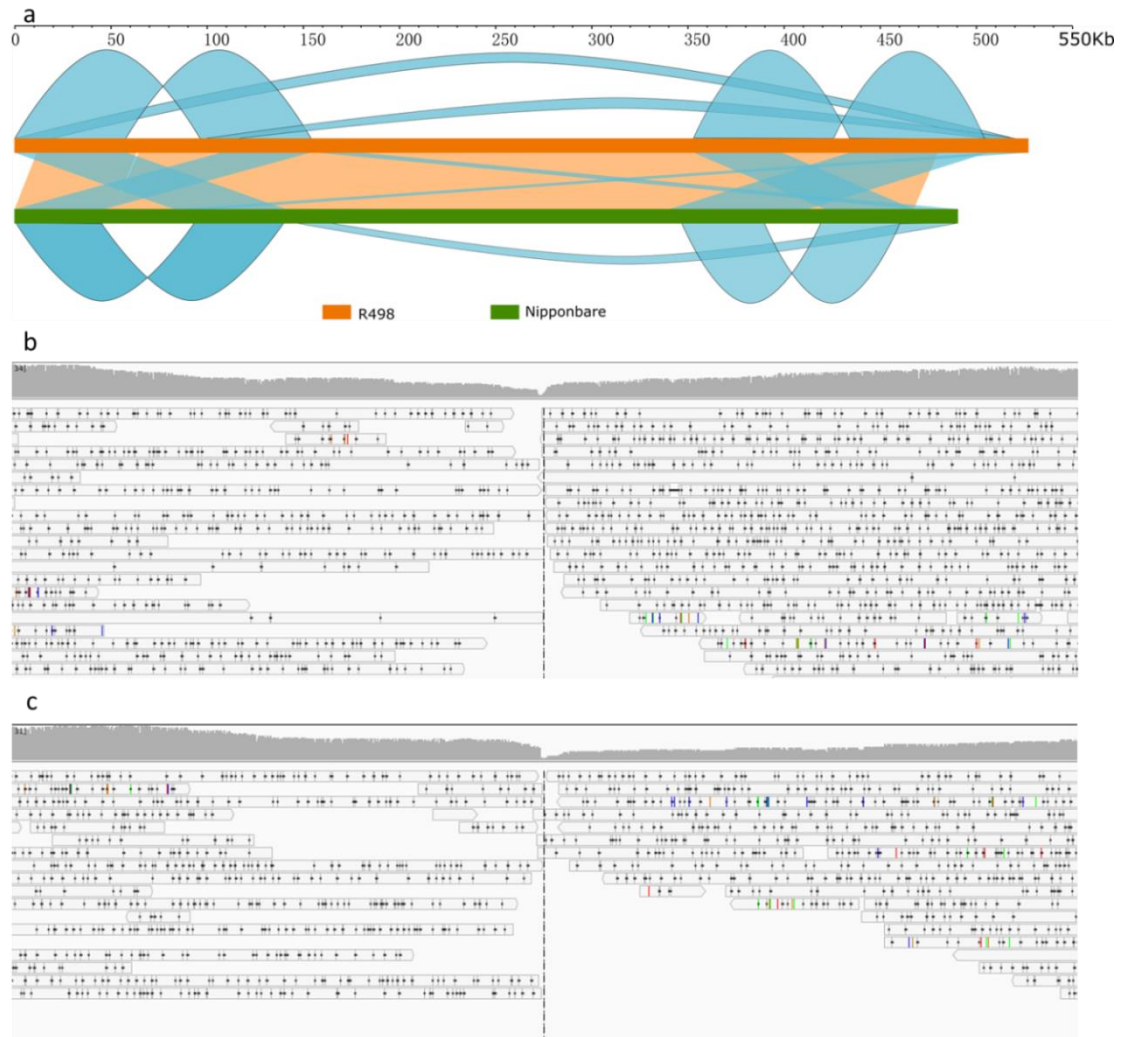

**Supplementary Figure 8: Comparison of mtDNAs of R498 and Nip.** (a) Schematic diagram displaying sequence comparison and internal repeats of R498 and Nip mtDNAs. All sequences in Nip (490.5 kb) are aligned to R498 (527.1 kb). The Nip region 1-467,565 bp is aligned to R498 region 9,353-478,019 bp with sequence identity >99.5%. The last 23 kb in Nip was aligned to other regions of the Nip mtDNA. Alignment blocks (blue) within R498 or Nip show their large internal duplications (sequence identity >99%). There are two pairs of large repeats in the same direction and a set of three smaller repeats in R498, two of which are inverted repeats around 0 kb (note that the DNA is actually circular). (b) and (c) Screen shots taken from IGV show alignment of Nip PacBio reads (<http://schatzlab.cshl.edu/data/ectools/>) to Nip mtDNA, indicating that the two regions were misassembled. (b) The region around 51,835 bp corresponds to a 1 kb deletion compared to R498. (c) The region around 467,565 bp supports that the right end 23 kb of Nip is possibly a misplaced duplication.

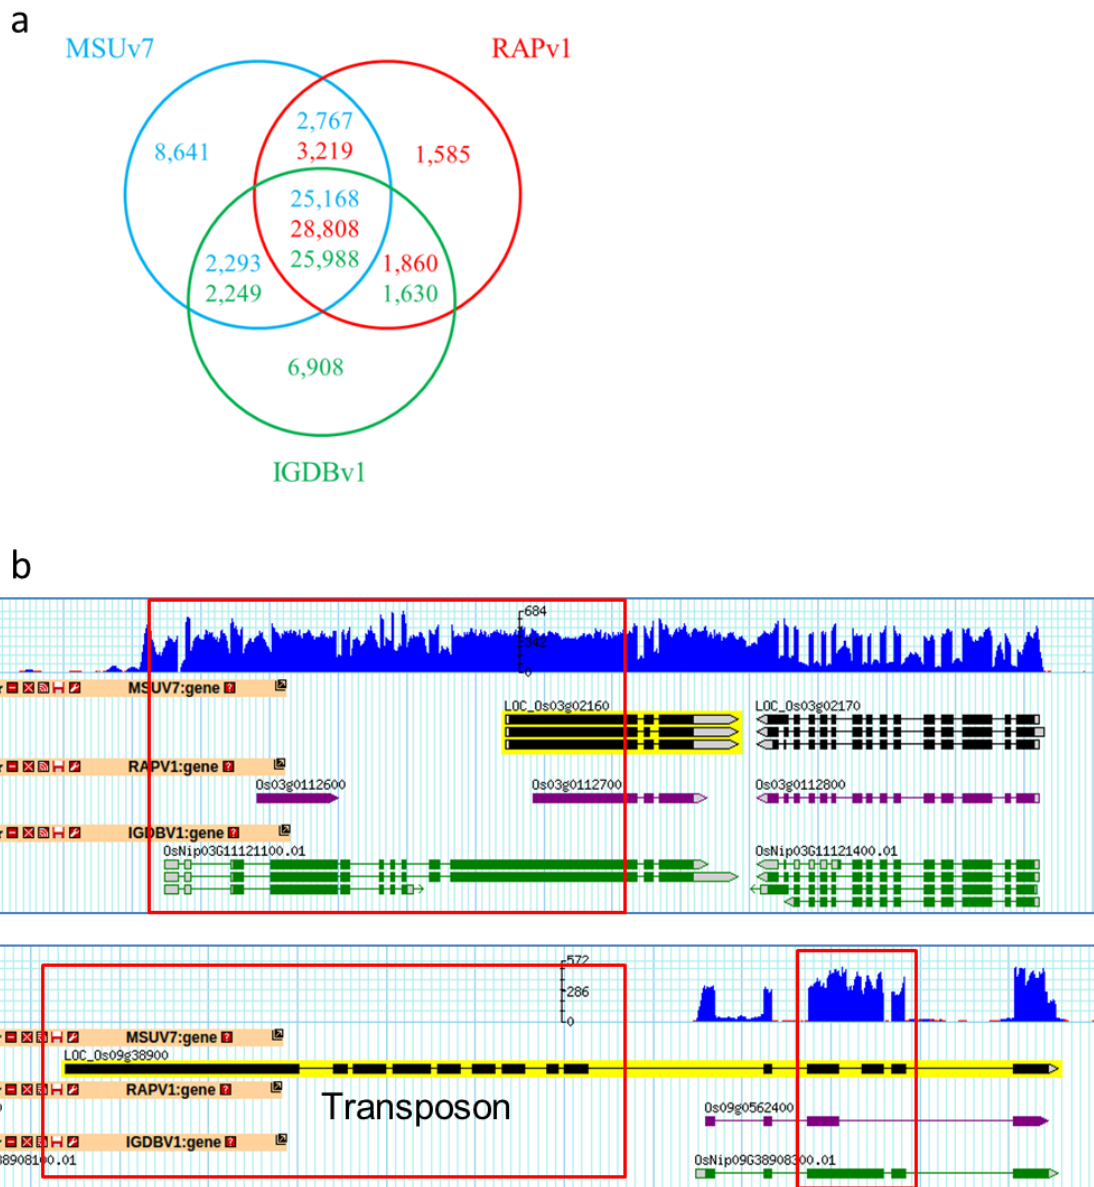

**Supplementary Figure 9: Comparison of our annotated genes in Nip to existing reference gene sets.** (a) Our Nip gene set (IGDBv1) contains 6,908 genes not overlapping with either MSU (MSUv7) or RAP (RAPv1) genes, while MSU and RAP contain 8,641 and 1,585 genes not overlapping with the other two sets, respectively. Among the overlapping genes, there are 24,616, 24,370, and 24,758 genes in MSU, RAP, and IGDB sharing the same exon-intron structure (with possibly different 5'-UTR start or 3'-UTR end) to the genes in at least one of the other two sets, respectively, suggesting their high similarity for the majority of the genes. The different number of overlapping genes for each set indicate a non 1:1 relationship, i.e., a gene in one set can overlap more than one gene in another set. (b) Examples of different overlapping genes annotated in the three gene sets. Both genes were incorrectly annotated in MSU and RAP based on RNA-seq evidence shown in blue.

**A**

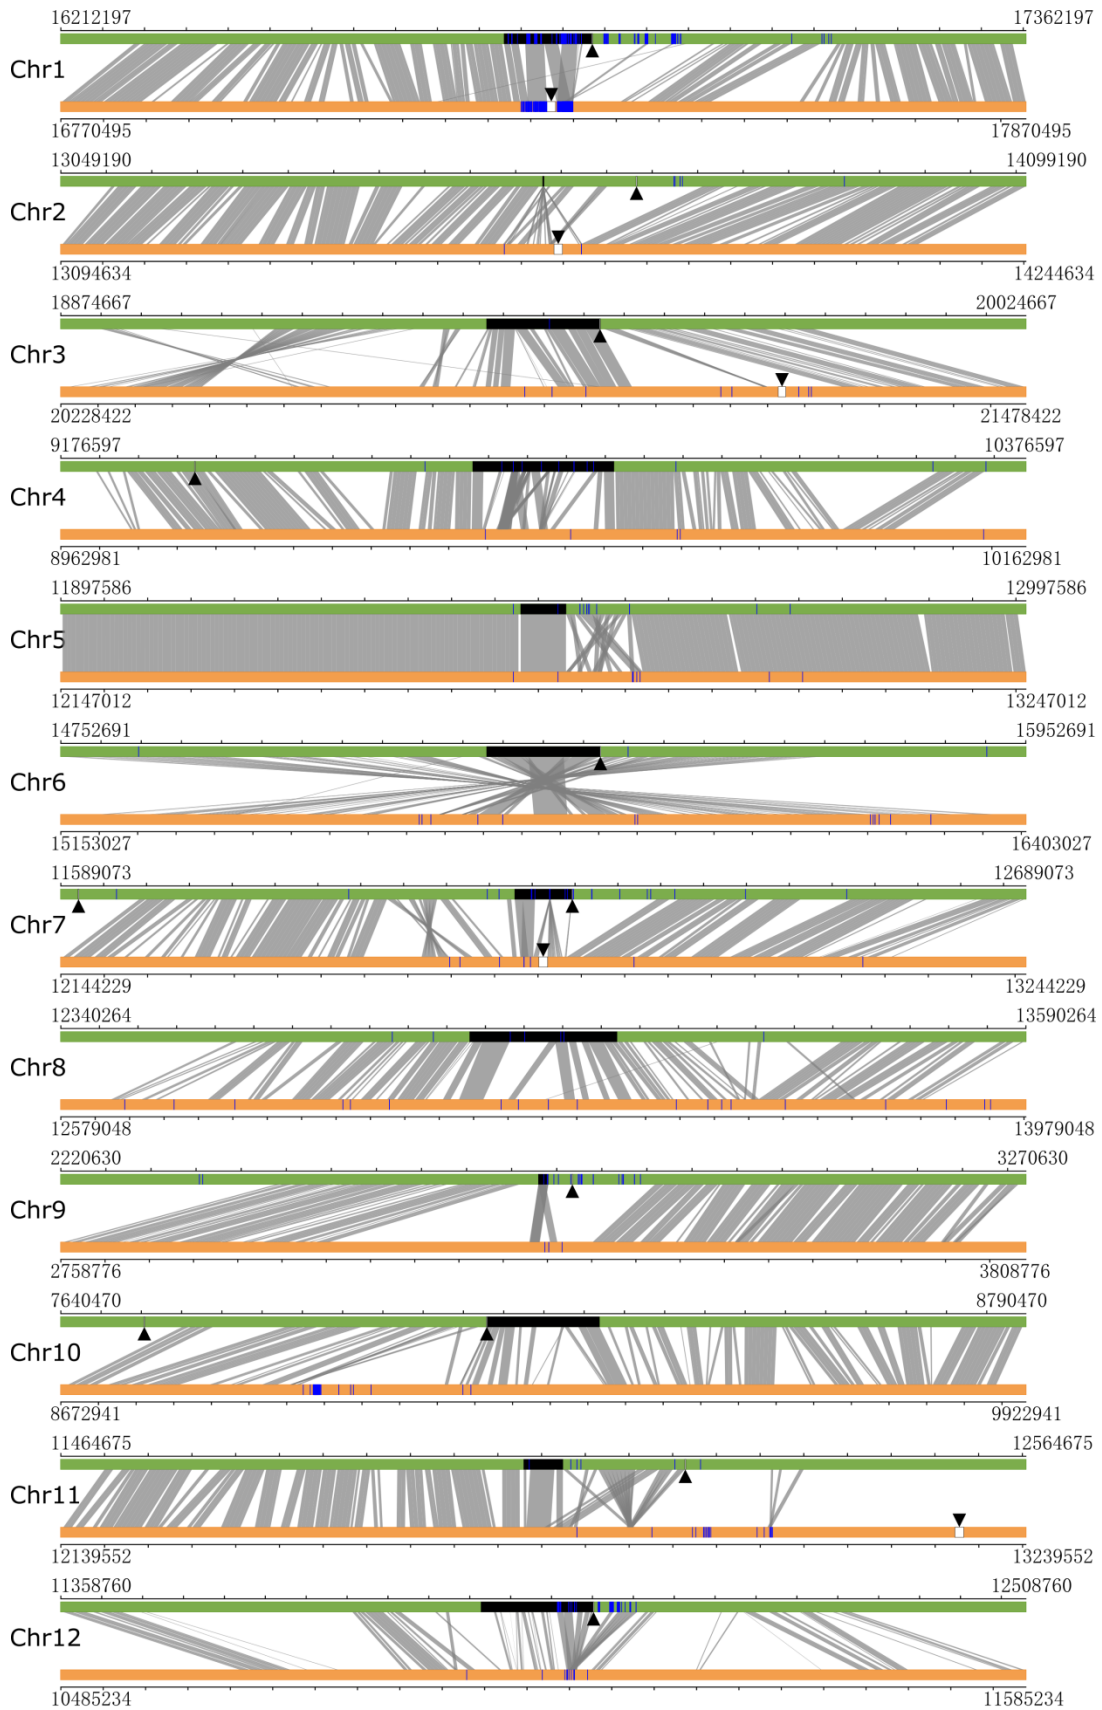

■ Nipponbare ■ R498 ■ Centromere □ N Gap ■ Tandem repeats of RCS2

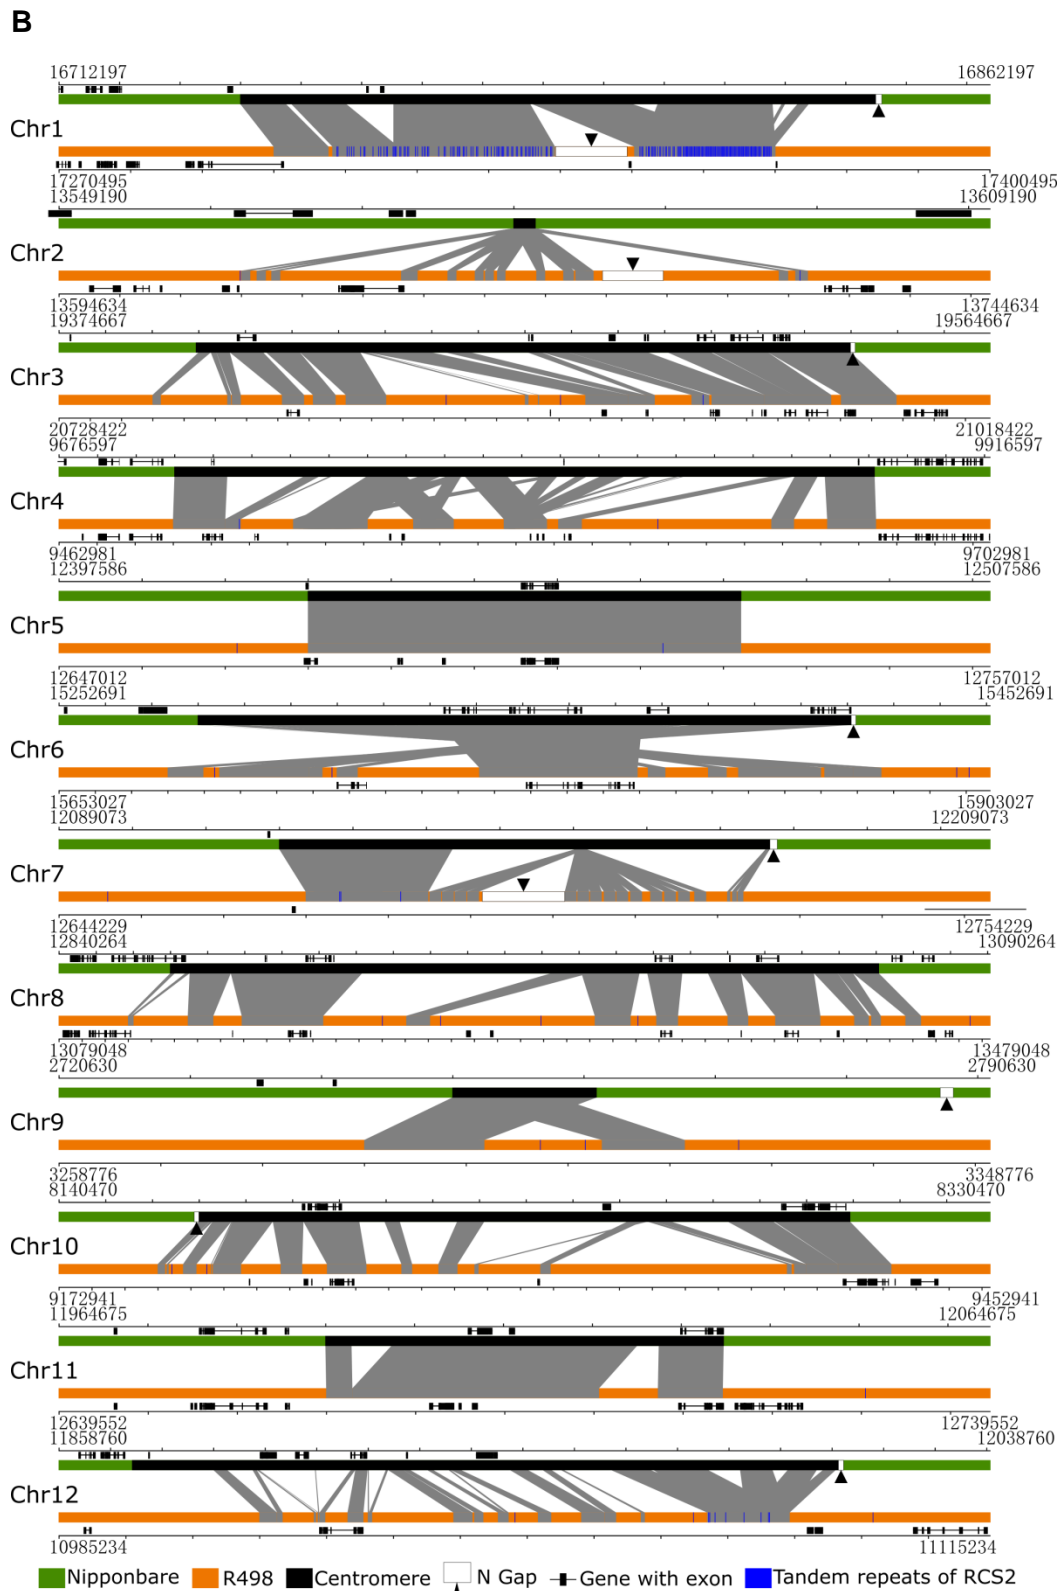

**Supplementary Figure 10: Schematic displaying syntenic blocks of R498 to Nip in centromere regions.** (A) All syntenic blocks in the regions were shown. (B) Only the alignments of Nip centromere-surrounding sequences ([http://rice.plantbiology.msu.edu/annotation\\_pseudo\\_centromeres.shtml](http://rice.plantbiology.msu.edu/annotation_pseudo_centromeres.shtml)) to R498 sequences were displayed with annotated genes.



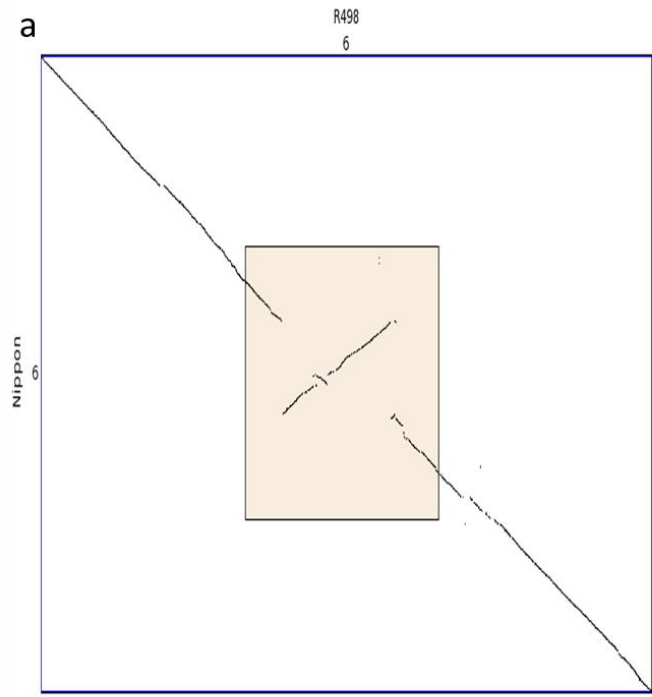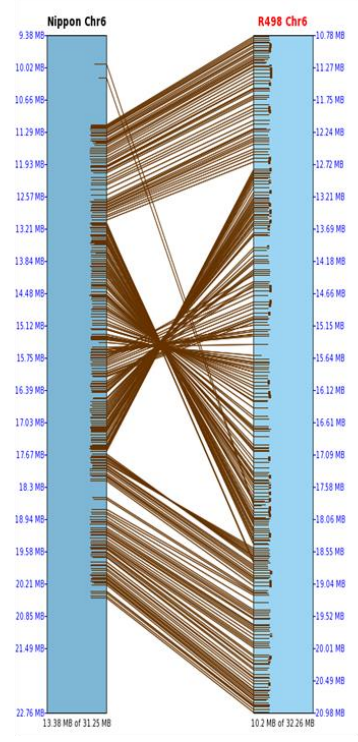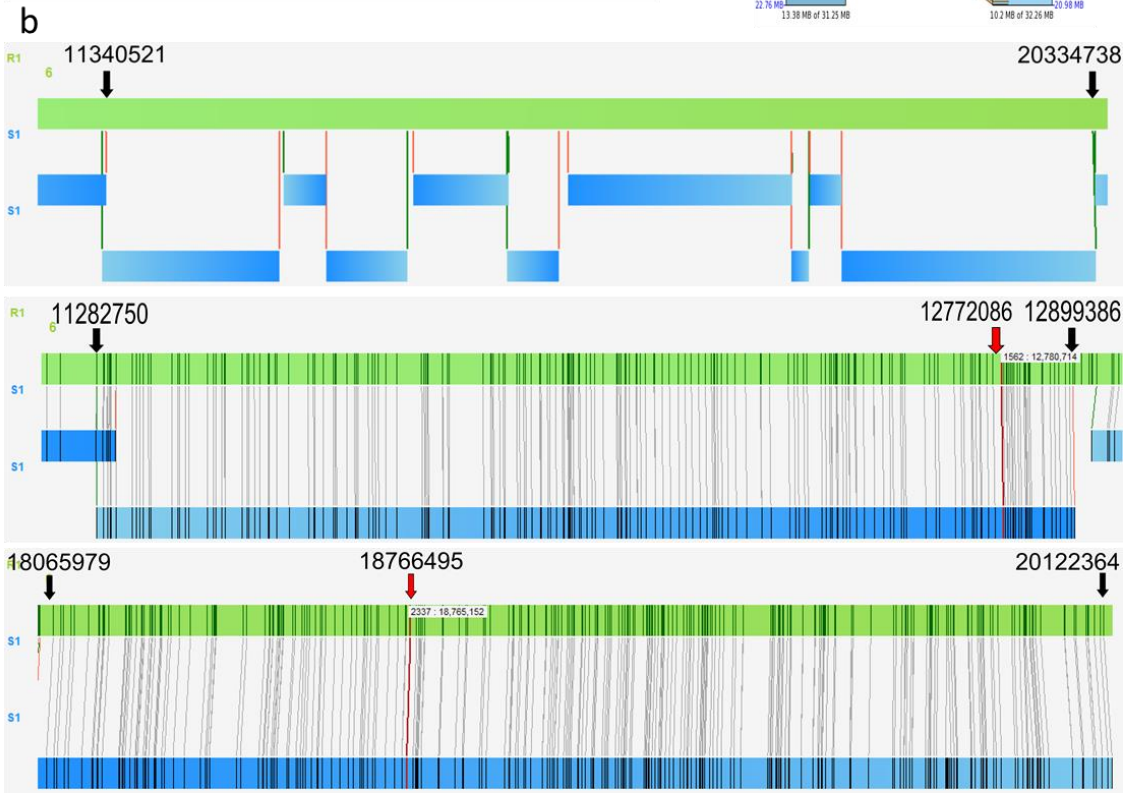

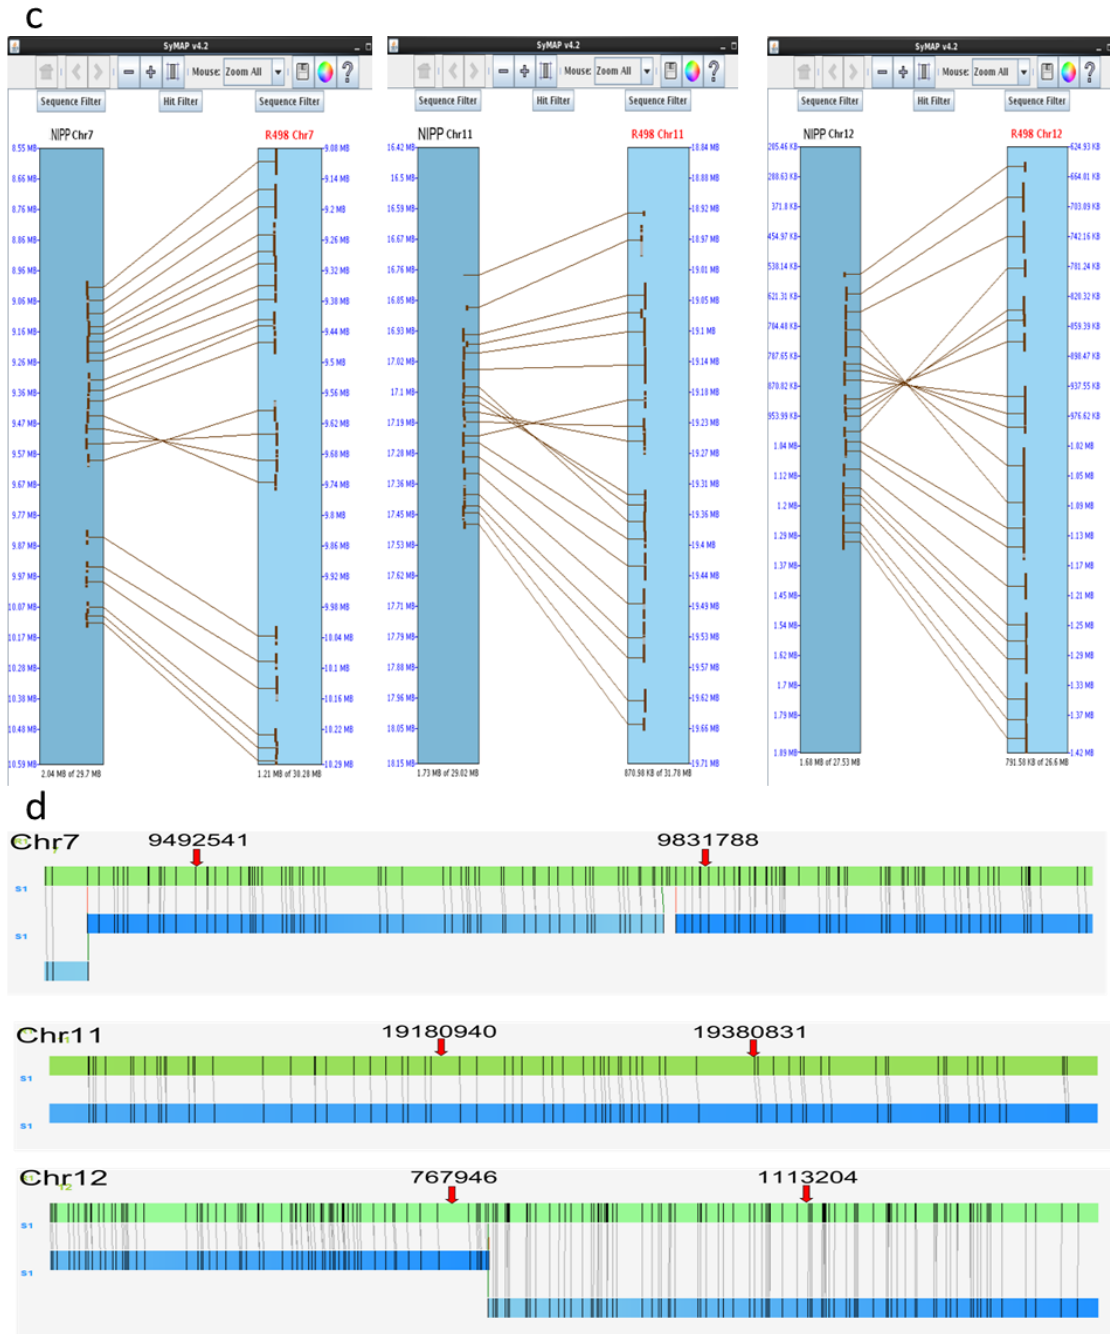

**Supplementary Figure 11: Inversions between R498 and Nip.** (a) Dot-matrix and synteny plot showing the inversion around the centromere of chromosome 6 from 12.76 Mb to 18.55 Mb between R498 and Nip. (b) Comparison of genome maps to R498 on chromosome 6 shows the correctness of the sequence assembly in R498. The first break point of the inversion (between 12.76-12.81 Mb) in R498 is supported by a single genome map. The second break point of inversion (between 18.51-18.55 Mb) in R498 supported by another single genome map. (c) Three smaller inversions on chromosomes 7, 11 and 12. (d) Comparison of the R498 sequences of the three inversions in (c) to genome maps shows that their boundaries (red arrows) in R498 were assembled correctly.

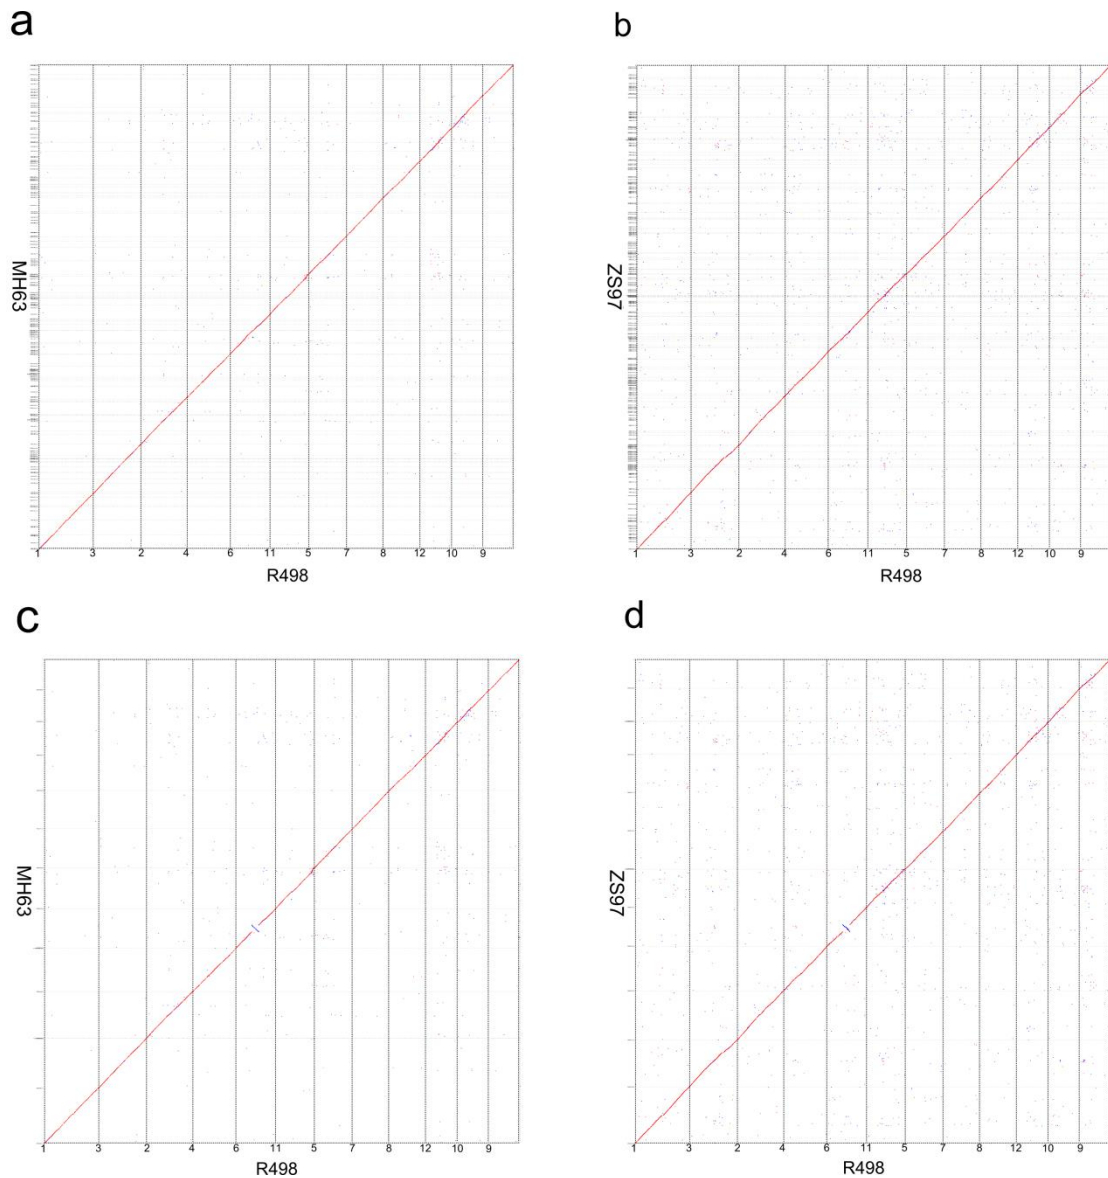

**Supplementary Figure 12: Dot plots showing alignment of the MH63 and ZS97 sequences to R498.** The x-axis represents R498 genome (0-390.3 Mb), and the y-axis represents MH63 in (a) or (c) (0-359.9 Mb) and ZS97 in (b) or (d) (0-346.8 Mb). **(a) (b)** Alignment of contig sequences to R498 genome. **(c) (d)** Alignment of chromosome sequences (pseudomolecules) to R498 genome. The numbers on x-axis are the chromosome numbers which are in the same order for y-axis. Both genomes of MH63 and ZS97 are highly syntenic to R498 at both contig level and chromosome level. The blue dotted lines in (c) and (d) represent the same inversion on chromosome 6 between R498 and Nip.

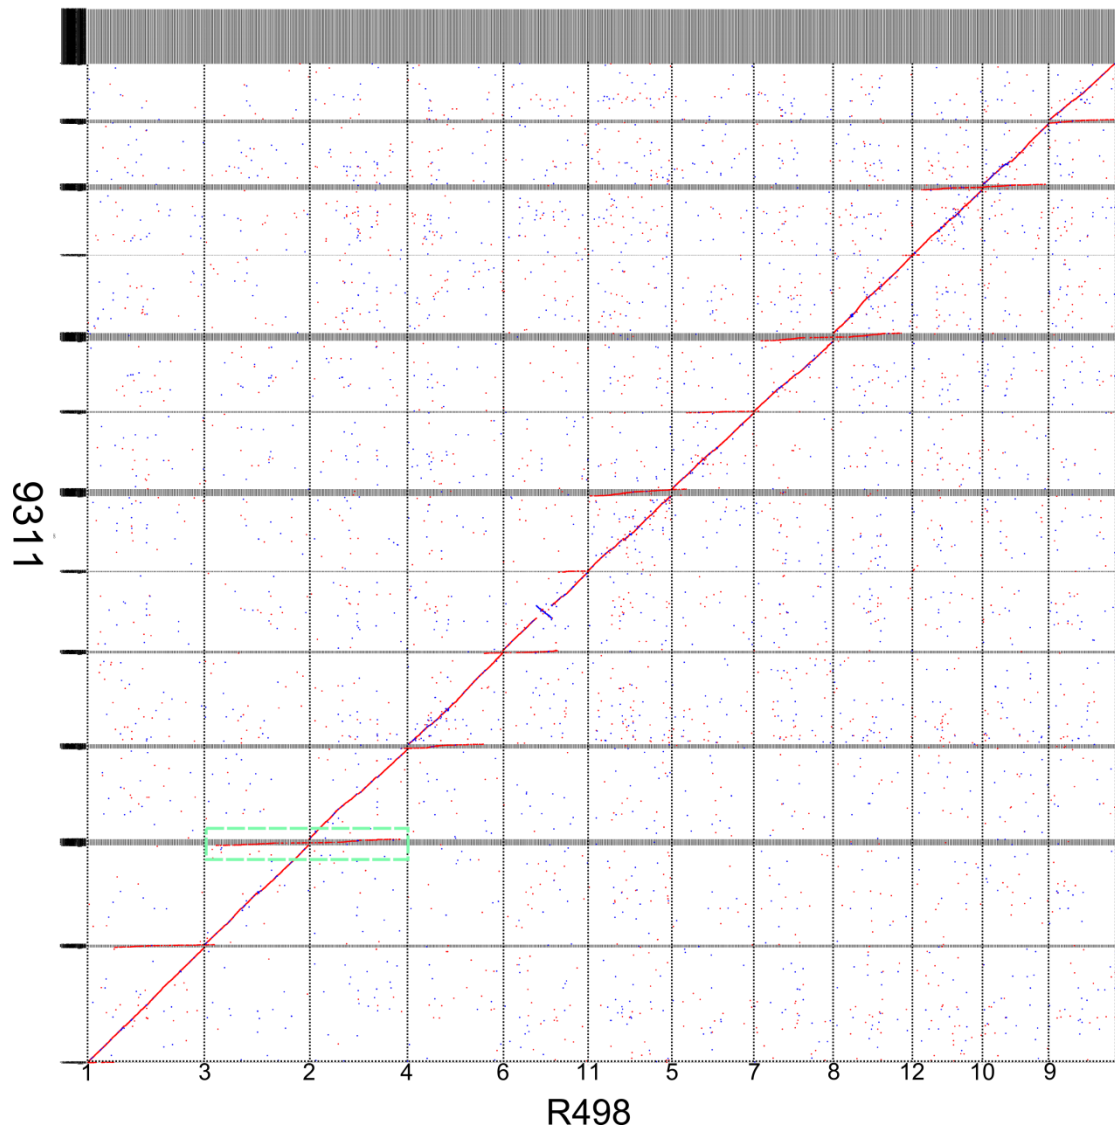

**Supplementary Figure 13: Dot plot showing alignment of the 93-11 sequences to R498.** The x-axis is the R498 sequences (0-390.3 Mb). The numbers on x-axis are the chromosome numbers which are in the same order for y-axis. Note that there are many 93-11 unanchored sequences being aligned to each chromosome of R498, represented by red dotted lines as the one bounded by the light blue dashed box. The blue dotted line represents the same inversion on chromosome 6 between R498 and Nip.

---

**Supplementary Tables****Supplementary Table 1: Summary of sequencing data for R498 samples.**

| <b>Data source</b> | <b>Data size (Gb)</b> | <b>Read N50</b> | <b>Sample</b>          |
|--------------------|-----------------------|-----------------|------------------------|
| Genomic PacBio     | 47                    | 11.2 kb         | 61 Cells               |
| Fosmid             | 6.3                   | 2x125 bp        | 576 Pools              |
| Population         | 26.9                  | 2x125 bp        | 364 F <sub>3</sub>     |
| BioNano            | 99                    | 202 kb          | 5 Cells                |
| Genomic Illumina   | 38.7                  | 2x150 bp        | 1 Lane (SR)            |
| RNA-seq            | 7.8                   | 2x125 bp        | Young hull 1 (H1)      |
| RNA-seq            | 7.7                   | 2x125 bp        | Young hull 2 (H2)      |
| RNA-seq            | 7.5                   | 2x125 bp        | Young leaf 1 (L1)      |
| RNA-seq            | 8.5                   | 2x125 bp        | Young leaf 2 (L2)      |
| RNA-seq            | 8                     | 2x125 bp        | Young spikelet 1 (SP1) |
| RNA-seq            | 7.9                   | 2x125 bp        | Young spikelet 2 (SP2) |
| RNA-seq            | 8.3                   | 2x125 bp        | Young stem (ST)        |
| RNA-seq            | 8.7                   | 2x125 bp        | Root (R)               |

**Supplementary Table 2: Statistics of the assembled contigs.**

| Assembly       | Contig type     | Size (Mb) | Contig #  | N50 (bp)  | Min (bp) | Max (bp)   |
|----------------|-----------------|-----------|-----------|-----------|----------|------------|
| PBcR HS        | All             | 471.1     | 3,822     | 443,801   | 13,499   | 3,013,488  |
|                | Genome          | 450.6     | 3,266     | 470,500   | 13,499   | 3,013,488  |
|                | mtDNA+cpD<br>NA | 10.23     | 326       | 32,892    | 14,882   | 79,505     |
|                | Microbe         | 6.33      | 92        | 96,124    | 16,109   | 548,152    |
|                | Centromere      | 2.96      | 98        | 30,980    | 13,558   | 85,726     |
|                | Unclassified    | 1.03      | 40        | 26,405    | 17,708   | 44,939     |
| CANU           | All             | 405.1     | 1,226     | 899,904   | 4,129    | 3,454,773  |
|                | Genome          | 400.4     | 1,112     | 903,464   | 6,385    | 3,454,773  |
|                | mtDNA+cpD<br>NA | 1.77      | 29        | 66,557    | 8,533    | 122,339    |
|                | Microbe         | 2.95      | 84        | 39,576    | 4,129    | 93,147     |
|                | Centromere      | 0         | -         | -         | -        | -          |
|                | Unclassified    | 0.05      | 1         | 51,828    | 51,828   | 51,828     |
| Falcon         | All             | 397.2     | 3,460     | 516,065   | 1,003    | 3,830,954  |
|                | Genome          | 385.9     | 2,963     | 525,893   | 1,003    | 3,830,954  |
|                | mtDNA+cpD<br>NA | 5.42      | 464       | 14,318    | 1,088    | 61,985     |
|                | Microbe         | 5.66      | 19        | 1,689,908 | 1,076    | 2,164,409  |
|                | Centromere      | 0         | -         | -         | -        | -          |
|                | Unclassified    | 0.18      | 14        | 17,906    | 1,964    | 27,674     |
| PBcR LS        | All             | 436       | 2,045     | 1,145,810 | 12,178   | 10,316,720 |
|                | Genome          | 423.2     | 1,687     | 1,185,206 | 13,178   | 10,316,720 |
|                | mtDNA+cpD<br>NA | 5.97      | 182       | 34,553    | 14,990   | 96,724     |
|                | Microbe         | 4.37      | 76        | 68,575    | 15,646   | 233,386    |
|                | Centromere      | 1.58      | 64        | 24,751    | 13,838   | 74,592     |
|                | Unclassified    | 0.93      | 36        | 28,414    | 15,662   | 46,996     |
| Fosmid contigs |                 | 39,700    | 1,215,918 | 42,048    | 10,000   | 616,771    |
| SR-SOAPdenovo  |                 | 477       | 1,954,935 | 2,527     | 64       | 120,702    |

Contig types: PBcR LS, PBcR assembly under low stringent conditions; PBcR HS, PBcR assembly under high stringent criteria; CANU, CANU assembly; Falcon, Falcon assembly; Fosmid contigs, assembled fosmid contigs from pooled fosmid clones; Centromere, indicating contigs containing centromeric satellites but not mapped onto the pseudomolecules; Unclassified, indicating the remaining contigs not mapped onto the pseudomolecules.

**Supplementary Table 3: The uncorrected indels of >10 kb in the final pseudomolecules of R498 comparing with genome maps.**

| <b>Chr</b> | <b>Start</b> | <b>End</b> | <b>Length</b> | <b>Indel type</b> |
|------------|--------------|------------|---------------|-------------------|
| 3*         | 7,986,535    | 7,987,001  | 28,618        | deletion          |
| 3          | 39,425,500   | 39,439,832 | 117,227       | deletion          |
| 3          | 39,450,696   | 39,613,108 | 12,021        | deletion          |
| 5          | 4,627,892    | 4,650,728  | 14,963        | insertion         |
| 5          | 4,672,952    | 4,689,226  | 21,759        | deletion          |
| 5          | 11,822,074   | 11,830,483 | 32,141        | deletion          |
| 5          | 16,873,416   | 16,878,464 | 64,420        | deletion          |
| 7          | 16,466,293   | 16,541,344 | 71,006        | deletion          |
| 8          | 6,022,125    | 6,023,806  | 27,980        | deletion          |
| 8*         | 6,195,389    | 6,248,808  | 10,780        | deletion          |
| 8*         | 17,908,992   | 17,913,266 | 35,508        | deletion          |
| 9          | 14,965,388   | 14,976,911 | 153,679       | deletion          |
| 9          | 15,007,454   | 15,032,827 | 175,273       | deletion          |
| 9          | 21,496,040   | 21,545,824 | 164,706       | deletion          |

Chr, chromosome. The chromosome start and end define the boundaries between which each indel is found by comparing to genome maps. Insertions and deletions are all on pseudomolecule. \*Potential indels that are present in the original PBcR HS contigs.

**Supplementary Table 4: R498 genome base accuracy estimated with Illumina short reads.**

| Sample | Coverage | SNP   |        |        | Indel |       |       | Error rate | Unaligned |
|--------|----------|-------|--------|--------|-------|-------|-------|------------|-----------|
|        |          | Homo  | Heter  | All    | Homo  | Heter | All   |            |           |
| H_1    | 19.81%   | 718   | 1,525  | 2,243  | 451   | 280   | 731   | 1.51E-5    | 3.87%     |
| H_2    | 22.41%   | 677   | 1,812  | 2,489  | 519   | 278   | 797   | 1.37E-5    | 4.49%     |
| L_1    | 20.39%   | 891   | 1,626  | 2,517  | 475   | 234   | 709   | 1.72E-5    | 4.26%     |
| L_2    | 20.76%   | 876   | 1,645  | 2,521  | 510   | 229   | 739   | 1.71E-5    | 4.20%     |
| SP_1   | 23.15%   | 836   | 2,002  | 2,838  | 539   | 270   | 809   | 1.52E-5    | 7.64%     |
| SP_2   | 23.22%   | 740   | 1,925  | 2,665  | 558   | 258   | 816   | 1.43E-5    | 5.50%     |
| ST     | 19.71%   | 687   | 1,554  | 2,241  | 445   | 204   | 649   | 1.47E-5    | 3.88%     |
| R      | 20.96%   | 822   | 1,520  | 2,342  | 472   | 190   | 662   | 1.58E-5    | 13.51%    |
| SR     | 99.88%   | 1,197 | 14,096 | 15,293 | 3,945 | 929   | 4,874 | 1.32E-5    | 5.20%     |

See Supplementary Table 1 for sample names. Coverage, percentage of genome covered by aligned short reads. Homo, homozygous; Heter, Heterozygous. Unaligned, percentage of short reads not aligned to genome. Only homozygous SNPs/Indels were used for base error calculation. Error rate is computed based on the covered portion of the genome (genome size: 390.3 Mb). Unaligned, the percentage of short reads not aligned to the genome. Please note that many of the SNPs/Indels are possibly errors in short reads introduced by PCR or genetic variations between R498 samples. Therefore, the error rate is only an upper bound estimate.



**Supplementary Table 5: Statistics of sequence sensitivity, specificity, redundancy and error rate of the WGS assemblies.**

| Assembly      | CGL (Mb) | Sn (%)* | ACL (Mb) | Redu (%) | OCN (#) | COL (Mb) | Err (%) |
|---------------|----------|---------|----------|----------|---------|----------|---------|
| PBcR HS       | 390.0    | 99.75   | 451.8    | 15.86    | 578     | 2.6      | 0.57    |
| Falcon        | 368.4    | 94.22   | 387.9    | 5.29     | 415     | 5.6      | 1.38    |
| CANU          | 389.7    | 99.68   | 400.2    | 2.68     | 213     | 4.3      | 1.07    |
| PBcR LS       | 390.4    | 99.84   | 422.8    | 8.3      | 782     | 13.9     | 3.28    |
| SR-SOAPdenovo | 390.7    | 99.94   | 466.2    | 19.45    | 13      | 0.014    | 0.003   |

Sn, Sensitivity = CGL/genome length; Redu, Redundancy = (ACL-CGL)/CGL; Err, Error = COL/ACL. \*Genome size: 390,983,850 bp.

CGL: Covered genome length by WGS contigs; ACL: total aligned contig length of a WGS assembly; OCN: overhang contig number, the number of contigs aligned to pseudomolecules with overhang length >1 kb; COL: sum of contig overhang length. If a contig is aligned to genome in multiple regions, it is designated as a chimeric contig, in which the aligned fragments except the longest one are treated as overhangs of the contig.

**Supplementary Table 6: Statistics of the predicted protein-coding genes in R498 and Nip**

| Type               | Nip         |             |             | R498        |
|--------------------|-------------|-------------|-------------|-------------|
|                    | IGDBv1      | MSUv7       | RAPv1       | IGDBv1      |
| Gene number        | 36,775      | 38,869      | 35,472      | 38,714      |
| Gene length*       | 2,408/3,191 | 2,188/2,855 | 2,458/3,082 | 2,292/3,012 |
| Transcript length* | 1,330/1,513 | 1,246/1,422 | 1,392/1,557 | 1,296/1,480 |
| Max cds length     | 14,900      | 16,310      | 16,030      | 14,214      |
| CDS length*        | 813/1,030   | 849/1,062   | 801/991     | 765/996     |
| Protein length*    | 270/343     | 283/354     | 267/330     | 254/331     |
| Exon length*       | 173/340     | 165/328     | 177/358     | 183/342     |
| Intron length*     | 153/438     | 174/420     | 155/438     | 152/419     |
| 5' UTR length*     | 112/211     | 133/213     | 107/252     | 116/211     |
| 3' UTR length*     | 271/336     | 335/416     | 279/441     | 274/340     |
| Exon number*       | 3.0/4.5     | 3.0/4.3     | 3.0/4.4     | 2.0/4.3     |
| Intron number*     | 2.0/3.5     | 2.0/3.3     | 2.0/3.4     | 1.0/3.3     |

\* Each number indicates the median/average.

**Supplementary Table 7: Statistics of the functionally annotated genes in R498 and Nip**

|                        | Nip    |       | R498   |       |
|------------------------|--------|-------|--------|-------|
|                        | Number | %     | Number | %     |
| InterPro               | 27,846 | 75.72 | 27,269 | 70.44 |
| GO                     | 19,822 | 53.9  | 19,506 | 50.38 |
| Pathway                | 4,259  | 11.58 | 4,133  | 10.68 |
| Functionally annotated | 32,385 | 88.06 | 32,839 | 84.82 |
| Other                  | 4,390  | 11.94 | 5,875  | 15.18 |
| Total                  | 36,775 | 100   | 38,714 | 100   |

**Supplementary Table 8: Statistics of repeat content in R498 and Nip**

|                                 | Nip         |                          | R498        |                          |
|---------------------------------|-------------|--------------------------|-------------|--------------------------|
|                                 | Length (bp) | Percentage of genome (%) | Length (bp) | Percentage of genome (%) |
| <b>Class I: Retrotransposon</b> | 105,098,791 | 28.16                    | 117,509,061 | 30.05                    |
| <b>LTR-Retrotransposon</b>      | 98,903,987  | 26.5                     | 111,173,484 | 28.43                    |
| LTR/Gypsy                       | 65,915,787  | 17.66                    | 80,330,011  | 20.55                    |
| LTR/Copia                       | 17,931,866  | 4.8                      | 15,079,454  | 3.86                     |
| LTR/Other                       | 15,056,334  | 4.03                     | 15,764,019  | 4.03                     |
| <b>Non-LTR Retrotransposon</b>  | 6,194,804   | 1.66                     | 6,335,577   | 1.62                     |
| SINE                            | 796,311     | 0.21                     | 848,061     | 0.22                     |
| LINE                            | 5,398,493   | 1.45                     | 5,487,516   | 1.4                      |
| <b>Class II: DNA Transposon</b> | 40,716,340  | 10.91                    | 40,743,536  | 10.42                    |
| EnSpm/CACTA                     | 14,117,095  | 3.78                     | 13,264,041  | 3.39                     |
| hAT                             | 1,641,580   | 0.44                     | 1,897,505   | 0.49                     |
| Harbinger                       | 3,729,352   | 1                        | 3,882,866   | 0.99                     |
| Tc1/Mariner                     | 462,697     | 0.12                     | 607,903     | 0.16                     |
| MuDR                            | 5,872,349   | 1.57                     | 5,993,554   | 1.53                     |
| Helitron                        | 1,850,232   | 0.5                      | 1,702,664   | 0.44                     |
| Other                           | 13,043,035  | 3.49                     | 13,395,003  | 3.43                     |
| <b>Other tandem repeat</b>      | 3,935,022   | 1.05                     | 4,548,484   | 1.16                     |
| <b>Low Complexity</b>           | 22,478      | 0.01                     | 17,672      | 0                        |
| <b>Unclassified</b>             | 1,117,819   | 0.3                      | 1,607,036   | 0.41                     |
| <b>Total content</b>            | 150,890,450 | 40.43                    | 164,425,789 | 42.05                    |

**Supplementary Table 9: The number of genes in the centromere regions and subtelomere regions in R498 and their corresponding regions in Nip.**

| R498  |            |            |      | Nipp  |            |            |      |
|-------|------------|------------|------|-------|------------|------------|------|
| Chr   | Start      | End        | Gene | Chr   | Start      | End        | Gene |
| Chr1  | 17,309,317 | 17,370,574 | 1    | Chr1  | 16,745,001 | 16,820,731 | 2    |
| Chr2  | 13,624,446 | 13,717,125 | 1    | Chr2  | 13,587,767 | 13,755,012 | 1    |
| Chr3  | 20,758,422 | 21,241,752 | 19   | Chr3  | 19,405,002 | 19,580,034 | 9    |
| Chr4  | 9,510,378  | 10,398,695 | 48   | Chr4  | 9,744,101  | 10,600,528 | 37   |
| Chr5  | 12,668,460 | 13,002,159 | 18   | Chr5  | 12,416,072 | 12,739,602 | 14   |
| Chr6  | 15,619,708 | 16,540,430 | 24   | Chr6  | 14,653,526 | 15,487,462 | 29   |
| Chr7  | 12,592,770 | 13,069,332 | 20   | Chr7  | 12,032,145 | 12,698,352 | 22   |
| Chr8  | 12,564,579 | 13,931,382 | 46   | Chr8  | 12,542,754 | 13,640,031 | 44   |
| Chr9  | 3,306,072  | 3,326,144  | 0    | Chr9  | 2,826,031  | 2,847,921  | 0    |
| Chr10 | 8,995,124  | 9,218,353  | 4    | Chr10 | 8,120,001  | 8,184,428  | 0    |
| Chr11 | 12,730,027 | 12,954,276 | 1    | Chr11 | 12,068,946 | 12,280,001 | 7    |
| Chr12 | 10,964,260 | 11,107,516 | 12   | Chr12 | 11,766,940 | 11,954,396 | 17   |
| Chr1  | 14,714     | 200,000    | 34   | Chr1  | 1,133      | 183,501    | 30   |
| Chr2  | 8,568      | 200,000    | 35   | Chr2  | 1          | 200,001    | 35   |
| Chr3  | 7,785      | 200,000    | 28   | Chr3  | 1,001      | 195,286    | 29   |
| Chr4  | 39,363     | 200,000    | 9    | Chr4  | 5,899      | 175,489    | 6    |
| Chr5  | 28,491     | 200,000    | 19   | Chr5  | 1          | 173,672    | 18   |
| Chr6  | 13,466     | 200,000    | 29   | Chr6  | 118,309    | 309,293    | 26   |
| Chr7  | 104,956    | 200,000    | 13   | Chr7  | 1,132      | 95,386     | 12   |
| Chr8  | 31,853     | 200,000    | 22   | Chr8  | 8,024      | 170,386    | 24   |
| Chr9  | 135,343    | 200,000    | 2    | Chr9  | 146,901    | 257,717    | 2    |
| Chr10 | 142,768    | 200,000    | 0    | Chr10 | 45,293     | 60,341     | 2    |
| Chr11 | 34,961     | 200,000    | 22   | Chr11 | 47,284     | 215,024    | 21   |
| Chr12 | 74,647     | 200,000    | 12   | Chr12 | 2,280      | 108,733    | 14   |
| Chr1  | 44,161,539 | 44,361,539 | 29   | Chr1  | 43,083,653 | 43,255,001 | 25   |
| Chr2  | 37,564,328 | 37,764,328 | 24   | Chr2  | 35,785,001 | 35,936,248 | 21   |
| Chr3  | 39,491,490 | 39,691,490 | 0    | Chr3  | 0          | 0          | 0    |
| Chr4  | 35,649,732 | 35,849,732 | 31   | Chr4  | 35,400,861 | 35,502,695 | 18   |
| Chr5  | 31,037,231 | 31,237,231 | 19   | Chr5  | 29,650,362 | 29,840,001 | 21   |
| Chr6  | 32,265,040 | 32,465,040 | 24   | Chr6  | 31,050,764 | 31,219,275 | 23   |
| Chr7  | 30,077,827 | 30,277,827 | 19   | Chr7  | 29,510,237 | 29,672,673 | 19   |
| Chr8  | 29,752,003 | 29,952,003 | 9    | Chr8  | 28,370,262 | 28,423,759 | 9    |
| Chr9  | 24,560,661 | 24,760,661 | 25   | Chr9  | 22,790,249 | 22,940,001 | 20   |
| Chr10 | 25,382,588 | 25,582,588 | 10   | Chr10 | 0          | 0          | 0    |
| Chr11 | 31,578,392 | 31,778,392 | 0    | Chr11 | 29,000,021 | 29,009,437 | 1    |
| Chr12 | 26,401,357 | 26,601,357 | 22   | Chr12 | 27,395,028 | 27,530,857 | 24   |

Centromere regions containing all the full units of rice centromere tandem repeats RCS2.

**Supplementary Table 10: rDNA (17S-5.8S-25S) repeats in R498 and Nip.**

| Genome | Chr   | Start  | End    | Length | rDNA Type | Identity |
|--------|-------|--------|--------|--------|-----------|----------|
| R498   | Chr10 | 10569  | 12216  | 1648   | 17s       | 99.21%   |
| R498   | Chr10 | 12305  | 12588  | 284    | 5.8S      | 91.52%   |
| R498   | Chr10 | 12803  | 16187  | 3385   | 25S       | 98.76%   |
| R498   | Chr10 | 18989  | 20800  | 1812   | 17s       | 99.34%   |
| R498   | Chr10 | 20889  | 21172  | 284    | 5.8S      | 91.52%   |
| R498   | Chr10 | 21384  | 24768  | 3385   | 25S       | 98.76%   |
| R498   | Chr10 | 27841  | 29651  | 1811   | 17s       | 99.28%   |
| R498   | Chr10 | 29740  | 30019  | 280    | 5.8S      | 91.79%   |
| R498   | Chr10 | 30230  | 33592  | 3363   | 25S       | 98.03%   |
| R498   | Chr10 | 36146  | 37951  | 1806   | 17s       | 99.01%   |
| R498   | Chr10 | 38040  | 38322  | 283    | 5.8S      | 91.17%   |
| R498   | Chr10 | 38537  | 41908  | 3372   | 25S       | 98.50%   |
| R498   | Chr10 | 44464  | 46266  | 1803   | 17s       | 98.84%   |
| R498   | Chr10 | 46355  | 46636  | 282    | 5.8S      | 91.49%   |
| R498   | Chr10 | 46844  | 50215  | 3372   | 25S       | 98.38%   |
| R498   | Chr10 | 52778  | 54582  | 1805   | 17s       | 98.95%   |
| R498   | Chr10 | 54720  | 54941  | 222    | 5.8S      | 98.65%   |
| R498   | Chr10 | 55154  | 58528  | 3375   | 25S       | 98.29%   |
| R498   | Chr10 | 61051  | 62845  | 1795   | 17s       | 98.78%   |
| R498   | Chr10 | 62934  | 63217  | 284    | 5.8S      | 91.52%   |
| R498   | Chr10 | 63429  | 66783  | 3355   | 25S       | 97.99%   |
| R498   | Chr10 | 69388  | 71195  | 1808   | 17s       | 99.12%   |
| R498   | Chr10 | 71283  | 71566  | 284    | 5.8S      | 91.52%   |
| R498   | Chr10 | 71777  | 75149  | 3373   | 25S       | 98.26%   |
| R498   | Chr10 | 77748  | 79548  | 1801   | 17s       | 98.13%   |
| R498   | Chr10 | 79637  | 79918  | 282    | 5.8S      | 91.49%   |
| R498   | Chr10 | 80128  | 83458  | 3331   | 25S       | 96.64%   |
| R498   | Chr10 | 85971  | 87772  | 1802   | 17s       | 98.73%   |
| R498   | Chr10 | 87864  | 88138  | 275    | 5.8S      | 90.25%   |
| R498   | Chr10 | 88349  | 91687  | 3339   | 25S       | 96.36%   |
| R498   | Chr10 | 94189  | 95994  | 1806   | 17s       | 99.01%   |
| R498   | Chr10 | 96082  | 96364  | 283    | 5.8S      | 91.17%   |
| R498   | Chr10 | 96578  | 99904  | 3327   | 25S       | 97.02%   |
| R498   | Chr10 | 102486 | 104289 | 1804   | 17s       | 98.79%   |
| R498   | Chr10 | 104377 | 104656 | 280    | 5.8S      | 91.46%   |
| R498   | Chr10 | 104868 | 108239 | 3372   | 25S       | 98.20%   |
| R498   | Chr10 | 110325 | 112123 | 1799   | 17s       | 98.46%   |
| R498   | Chr10 | 112206 | 112490 | 285    | 5.8S      | 91.20%   |
| R498   | Chr10 | 112694 | 116047 | 3354   | 25S       | 97.50%   |
| R498   | Chr10 | 118825 | 120636 | 1812   | 17s       | 99.34%   |
| R498   | Chr10 | 120725 | 121008 | 284    | 5.8S      | 91.52%   |

|      |       |          |          |      |      |        |
|------|-------|----------|----------|------|------|--------|
| R498 | Chr11 | 26262484 | 26262652 | 169  | 17s  | 98.21% |
| R498 | Chr5  | 3969104  | 3969694  | 591  | 25S  | 91.53% |
| R498 | Chr6  | 8437060  | 8437402  | 343  | 25S  | 91.52% |
| R498 | Chr7  | 12101977 | 12103274 | 1298 | 25S  | 95.78% |
| R498 | Chr7  | 12103289 | 12104465 | 1177 | 25S  | 96.26% |
| R498 | Chr9  | 10566    | 12211    | 1646 | 17s  | 98.85% |
| R498 | Chr9  | 12298    | 12581    | 284  | 5.8S | 91.52% |
| R498 | Chr9  | 12795    | 16177    | 3383 | 25S  | 98.64% |
| R498 | Chr9  | 19137    | 20941    | 1805 | 17s  | 98.95% |
| R498 | Chr9  | 21030    | 21313    | 284  | 5.8S | 91.52% |
| R498 | Chr9  | 21525    | 24883    | 3359 | 25S  | 97.88% |
| R498 | Chr9  | 27127    | 28938    | 1812 | 17s  | 99.34% |
| R498 | Chr9  | 29027    | 29310    | 284  | 5.8S | 91.52% |
| R498 | Chr9  | 29525    | 32910    | 3386 | 25S  | 98.79% |
| R498 | Chr9  | 35508    | 37318    | 1811 | 17s  | 99.06% |
| R498 | Chr9  | 37406    | 37689    | 284  | 5.8S | 91.52% |
| R498 | Chr9  | 37901    | 41266    | 3366 | 25S  | 98.20% |
| R498 | Chr9  | 43797    | 45607    | 1811 | 17s  | 98.84% |
| R498 | Chr9  | 45695    | 45972    | 278  | 5.8S | 91.34% |
| R498 | Chr9  | 46182    | 49528    | 3347 | 25S  | 97.61% |
| R498 | Chr9  | 52086    | 53897    | 1812 | 17s  | 99.34% |
| R498 | Chr9  | 53985    | 54268    | 284  | 5.8S | 91.52% |
| R498 | Chr9  | 54483    | 57868    | 3386 | 25S  | 98.79% |
| Nip  | Chr9  | 1000     | 1480     | 480  | 25S  | 98.13% |
| Nip  | Chr9  | 3625     | 5436     | 1811 | 17s  | 99.45% |
| Nip  | Chr9  | 6023     | 9408     | 3385 | 25S  | 98.79% |
| Nip  | Chr9  | 11553    | 13364    | 1811 | 17s  | 99.45% |
| Nip  | Chr9  | 13951    | 17336    | 3385 | 25S  | 98.79% |
| Nip  | Chr9  | 19481    | 21292    | 1811 | 17s  | 99.45% |
| Nip  | Chr9  | 21879    | 25264    | 3385 | 25S  | 98.79% |
| Nip  | Chr9  | 27409    | 29220    | 1811 | 17s  | 99.45% |
| Nip  | Chr9  | 29807    | 33192    | 3385 | 25S  | 98.79% |
| Nip  | Chr9  | 35337    | 37148    | 1811 | 17s  | 99.45% |
| Nip  | Chr5  | 3893143  | 3893733  | 590  | 25S  | 91.02% |
| Nip  | Chr6  | 8367093  | 8367435  | 342  | 25S  | 92.11% |
| Nip  | Chr11 | 23702822 | 23702990 | 168  | 17s  | 97.62% |
| Nip  | Chr2  | 28715349 | 28716992 | 1643 | 25S  | 98.24% |
| Nip  | Chr2  | 28719356 | 28721162 | 1806 | 17s  | 98.89% |
| Nip  | Chr2  | 28721256 | 28721537 | 281  | 5.8S | 92.53% |
| Nip  | Chr2  | 28721753 | 28721984 | 231  | 25S  | 99.57% |

**Supplementary Table 11: Alignment between R498 and Nip around the boundaries of inversion on chromosome 6.**

| Chr      | R498_start        | R498_end          | Nip_start         | Nip_end           | R498_length   | Nip_length    | Identity  |
|----------|-------------------|-------------------|-------------------|-------------------|---------------|---------------|-----------|
| 6        | 12,743,460        | 12,758,973        | 13,051,949        | 13,067,468        | 15,514        | 15,520        | 98        |
| <b>6</b> | <b>12,760,622</b> | <b>12,762,376</b> | <b>13,069,631</b> | <b>13,071,448</b> | <b>1,755</b>  | <b>1,818</b>  | <b>95</b> |
| <b>6</b> | <b>12,817,462</b> | <b>12,819,558</b> | <b>17,632,495</b> | <b>17,630,424</b> | <b>2,097</b>  | <b>2,072</b>  | <b>95</b> |
| 6        | 12,824,000        | 12,832,609        | 17,622,992        | 17,614,390        | 8,610         | 8,603         | 98        |
| 6        | 12,832,462        | 12,841,815        | 17,614,391        | 17,605,012        | 9,354         | 9,380         | 99        |
| 6        | 12,841,733        | 12,853,219        | 17,604,768        | 17,593,263        | 11,487        | 11,506        | 99        |
| 6        | 12,853,696        | 12,858,703        | 17,590,727        | 17,585,709        | 5,008         | 5,019         | 99        |
| 6        | 12,859,679        | 12,872,169        | 17,585,700        | 17,573,120        | 12,491        | 12,581        | 97        |
| 6        | 18,435,021        | 18,500,300        | 13,200,518        | 13,135,281        | 65,280        | 65,238        | 98        |
| 6        | 18,501,312        | 18,506,480        | 13,133,431        | 13,128,253        | 5,169         | 5,179         | 97        |
| 6        | 18,506,672        | 18,511,650        | 13,127,528        | 13,122,409        | 4,979         | 5,120         | 95        |
| <b>6</b> | <b>18,512,446</b> | <b>18,514,113</b> | <b>13,121,348</b> | <b>13,119,682</b> | <b>1,668</b>  | <b>1,667</b>  | <b>99</b> |
| <b>6</b> | <b>18,551,092</b> | <b>18,615,997</b> | <b>17,853,290</b> | <b>17,788,273</b> | <b>64,906</b> | <b>65,018</b> | <b>98</b> |
| 6        | 18,615,992        | 18,620,537        | 17,787,926        | 17,783,337        | 4,546         | 4,590         | 97        |
| 6        | 18,620,936        | 18,649,662        | 17,782,802        | 17,753,990        | 28,727        | 28,813        | 98        |

The first boundary on R498 is between 12.76 Mb and 12.82 Mb; the second boundary on R498 is between 18.51 Mb and 18.56 Mb. Chr, chromosome.

**Supplementary Table 12: Go enrichment analysis of genes enclosed in the PVs between R498 and Nip.**

| GO enrichment of genes in R498 PVs relative to Nip |             |             |                    |                                                                 |              |
|----------------------------------------------------|-------------|-------------|--------------------|-----------------------------------------------------------------|--------------|
| ID                                                 | P-value     | Q-value     | Go category        | Go term                                                         | Significance |
| GO:0015074                                         | 3.39E-16    | 2.98E-14    | biological process | DNA integration                                                 | ***          |
| GO:0006468                                         | 5.14E-11    | 1.29E-09    | biological process | protein phosphorylation                                         | ***          |
| GO:0000723                                         | 1.32E-07    | 2.91E-06    | biological process | telomere maintenance                                            | ***          |
| GO:0006383                                         | 1.19E-04    | 1.79E-03    | biological process | transcription from RNA polymerase III promoter                  | **           |
| GO:0006281                                         | 1.07E-03    | 1.25E-02    | biological process | DNA repair                                                      | *            |
| GO:0005666                                         | 0.00011938  | 0.001786566 | cellular component | DNA-directed RNA polymerase III complex                         | **           |
| GO:0043531                                         | 2.64E-21    | 4.65E-19    | molecular function | ADP binding                                                     | ***          |
| GO:0003676                                         | 7.90E-15    | 4.64E-13    | molecular function | nucleic acid binding                                            | ***          |
| GO:0016772                                         | 2.28E-12    | 1.00E-10    | molecular function | transferase activity, transferring phosphorus-containing groups | ***          |
| GO:0004672                                         | 4.81E-11    | 1.29E-09    | molecular function | protein kinase activity                                         | ***          |
| GO:0004674                                         | 4.91E-11    | 1.29E-09    | molecular function | protein serine/threonine kinase activity                        | ***          |
| GO:0003678                                         | 3.79E-07    | 7.41E-06    | molecular function | DNA helicase activity                                           | ***          |
| GO:0005524                                         | 0.000121811 | 0.001786566 | molecular function | ATP binding                                                     | **           |
| GO:0030247                                         | 0.000170825 | 0.002312706 | molecular function | polysaccharide binding                                          | **           |
| GO:0004523                                         | 0.000224372 | 0.002820672 | molecular function | RNA-DNA hybrid ribonuclease activity                            | **           |
|                                                    |             |             |                    |                                                                 |              |
| GO enrichment of genes in Nip PVs relative to R498 |             |             |                    |                                                                 |              |
| ID                                                 | P-value     | Q-value     | Go category        | Go term                                                         | Significance |
| GO:0015074                                         | 3.98E-22    | 2.90E-20    | biological process | DNA integration                                                 | ***          |
| GO:0019684                                         | 3.69E-05    | 0.000768802 | biological process | photosynthesis, light reaction                                  | ***          |
| GO:0009772                                         | 0.00014414  | 0.002630558 | biological process | photosynthetic electron transport in photosystem II             | **           |

|            |             |             |                    |                                                                                                                      |     |
|------------|-------------|-------------|--------------------|----------------------------------------------------------------------------------------------------------------------|-----|
| GO:0035556 | 0.001781665 | 0.023647556 | biological process | intracellular signal transduction                                                                                    | *   |
| GO:0003676 | 2.66E-34    | 3.89E-32    | molecular function | nucleic acid binding                                                                                                 | *** |
| GO:0004523 | 3.50E-11    | 1.70E-09    | molecular function | RNA-DNA hybrid ribonuclease activity                                                                                 | *** |
| GO:0043531 | 2.78E-06    | 0.000100078 | molecular function | ADP binding                                                                                                          | *** |
| GO:0008234 | 3.43E-06    | 0.000100078 | molecular function | cysteine-type peptidase activity                                                                                     | *** |
| GO:0016651 | 4.37E-06    | 0.000106253 | molecular function | oxidoreductase activity, acting on NAD(P)H                                                                           | *** |
| GO:0045156 | 0.000189336 | 0.003071454 | molecular function | electron transporter, transferring electrons within the cyclic electron transport pathway of photosynthesis activity | **  |
| GO:0008137 | 0.000214183 | 0.003127069 | molecular function | NADH dehydrogenase (ubiquinone) activity                                                                             | **  |
| GO:0047134 | 0.003717539 | 0.045230052 | molecular function | protein-disulfide reductase activity                                                                                 | *   |
| GO:0048038 | 0.004108067 | 0.046136755 | molecular function | quinone binding                                                                                                      | *   |



**Supplementary Table 13: AGP file of the corrected regions >10 kb with added WGS contigs.**

| Indel | Start   | End     | Comp Num | Type | Comp Id | Comp Start | Comp End | Orient |
|-------|---------|---------|----------|------|---------|------------|----------|--------|
| 1     | 1       | 976914  | 1        | W    | Ctg901  | 1          | 976914   | +      |
| 1     | 986389  | 1010336 | 2        | I    | Ctg902  | 9474       | 33422    | +      |
| 1     | 1016279 | 2203446 | 3        | W    | Ctg1046 | 4          | 1187171  | +      |
| 2     | 1       | 349255  | 1        | W    | Ctg299  | 1          | 349255   | -      |
| 2     | 357032  | 398646  | 2        | I    | Ctg146  | 132        | 41746    | +      |
| 2     | 409328  | 633644  | 3        | W    | Ctg152  | 4          | 224320   | +      |
| 3     | 1       | 251602  | 1        | W    | Ctg149  | 1          | 251602   | +      |
| 3     | 259328  | 284243  | 2        | I    | Ctg725  | 8          | 24923    | +      |
| 3     | 310321  | 704515  | 3        | W    | Ctg724  | 26078      | 420272   | +      |
| 4     | 1       | 801230  | 1        | W    | Ctg1207 | 1          | 801230   | +      |
| 4     | 813682  | 846044  | 2        | I    | Ctg345  | 1292       | 33654    | -      |
| 4     | 873927  | 1414417 | 3        | W    | Ctg283  | 36219      | 576709   | +      |
| 5     | 1       | 231474  | 1        | W    | Ctg8308 | 1          | 231474   | +      |
| 5     | 242827  | 248830  | 2        | I    | Ctg8309 | 19032      | 25035    | +      |
| 5     | 254591  | 275017  | 3        | I    | Ctg8606 | 3          | 20429    | -      |
| 5     | 275090  | 629314  | 4        | W    | Ctg9353 | 78         | 354302   | -      |
| 6     | 1       | 193072  | 1        | W    | Ctg1624 | 1          | 193072   | +      |
| 6     | 197027  | 227775  | 2        | I    | Ctg1707 | 3          | 30751    | -      |
| 6     | 227932  | 262848  | 3        | I    | Ctg336  | 1          | 34916    | +      |
| 6     | 271249  | 424918  | 4        | W    | Ctg1628 | 16231      | 169900   | +      |
| 7     | 1       | 381372  | 1        | W    | Ctg11   | 1          | 381372   | +      |
| 7     | 392762  | 427426  | 2        | I    | Ctg7915 | 12         | 34676    | +      |
| 7     | 427510  | 1459182 | 3        | W    | Ctg1061 | 1          | 1031672  | +      |
| 8     | 1       | 260320  | 1        | W    | Ctg6736 | 1          | 260320   | +      |
| 8     | 260986  | 280479  | 2        | I    | Ctg6737 | 1          | 19493    | +      |
| 8     | 280932  | 299324  | 3        | I    | Ctg6738 | 3          | 18395    | +      |
| 8     | 299832  | 340125  | 4        | I    | Ctg6739 | 128        | 40421    | +      |
| 8     | 341901  | 371692  | 5        | I    | Ctg4737 | 2          | 30001    | -      |
| 8     | 390218  | 612117  | 6        | W    | Ctg7508 | 3          | 221902   | -      |
| 9     | 1       | 203132  | 1        | W    | Ctg8356 | 1          | 203132   | +      |
| 9     | 207518  | 235718  | 2        | I    | Ctg8355 | 19         | 28219    | +      |
| 9     | 239481  | 265599  | 3        | I    | Ctg8354 | 3          | 26121    | +      |
| 9     | 269761  | 295683  | 4        | I    | Ctg8323 | 2          | 25924    | -      |
| 9     | 297840  | 536323  | 5        | W    | Ctg4697 | 517        | 239000   | -      |
| 10    | 1       | 1009634 | 1        | W    | Ctg816  | 1          | 1009634  | +      |
| 10    | 1029397 | 1057514 | 2        | I    | Ctg247  | 16321      | 44438    | -      |
| 10    | 1059328 | 1334937 | 3        | W    | Ctg817  | 7          | 275616   | +      |
| 11    | 1       | 1548870 | 1        | W    | Ctg1053 | 1          | 1548870  | +      |

|    |         |         |   |   |         |      |         |   |
|----|---------|---------|---|---|---------|------|---------|---|
| 11 | 1549312 | 1582788 | 2 | I | Ctg1056 | 5    | 33481   | + |
| 11 | 1587820 | 1803115 | 3 | W | Ctg1058 | 14   | 215309  | + |
| 12 | 1       | 296194  | 1 | W | Ctg1519 | 1    | 296194  | + |
| 12 | 296834  | 339964  | 2 | I | Ctg186  | 9    | 43130   | - |
| 12 | 340917  | 763245  | 3 | W | Ctg851  | 7    | 422329  | - |
| 13 | 1       | 276682  | 1 | W | Ctg8840 | 1    | 276682  | + |
| 13 | 277963  | 330845  | 2 | I | Ctg6112 | 4    | 52886   | + |
| 13 | 339712  | 373031  | 3 | I | Ctg8443 | 9    | 33328   | - |
| 13 | 376291  | 404595  | 4 | I | Ctg8444 | 2    | 28306   | - |
| 13 | 406012  | 553221  | 5 | W | Ctg8601 | 6219 | 153428  | + |
| 14 | 1       | 1092655 | 1 | W | Ctg72   | 1    | 1092655 | + |
| 14 | 1099465 | 1156220 | 2 | I | Ctg208  | 76   | 56831   | - |
| 14 | 1170328 | 1652206 | 3 | W | Ctg113  | 8932 | 490810  | + |
| 15 | 1       | 288727  | 1 | W | Ctg46   | 1    | 288727  | + |
| 15 | 289176  | 352398  | 2 | I | Ctg7750 | 19   | 63241   | - |
| 15 | 354921  | 474481  | 3 | W | Ctg105  | 42   | 119602  | + |

Indel, the regions containing an indel. Start and End, starting and ending positions for the contig sequences in the regions. The gaps between contigs were filled with fosmid contigs. Comp, contig component in each region. W, the boundary contigs for each region; I, newly added contigs in each region. Comp Start and End, defined the starting and end positions of the contig sequences used in the region. Orient, the orientation of the contigs in the final sequences.

## Supplementary Notes

### Supplementary Note 1: Why and how does the contig connection process work?

The process of building super-contigs can be viewed as to connect or extend WGS contigs on the genetic map iteratively with unanchored WGS contigs and fosmid contigs by merging the nodes on overlap graph (Fig. 1).

Each fosmid clone pool contains about 10% random portion of the genome, in which many segmentally duplicated regions become single-copy regions. These regions can be correctly assembled in random fosmid pools. It is possible to assemble chimeric contigs in each pool, but for each region, there should be always more correctly assembled contigs than incorrect ones. Thus, between any node pair, if they are truly immediately adjacent, there should be many fosmid contigs to connect them. For random node pairs, there should be only a small number of chimeric fosmid contigs to connect them. Therefore, the node pairs with many fosmid links with high quality overlaps should be connected first; we used a generalized score (weighed score; see Methods) to prioritize the node pairs to be merged.

---

All links between a pair of nodes on the overlap graph are created based on their overlaps to the opposite ends of fosmid contigs. However, a link can be viewed as one of the following subtypes based on the genetic map positions of the nodes it connects: (1) direct link (negative edge length) between a pair of neighboring WGS contigs with sequence overlap between the WGS contigs; (2) indirect link (positive edge length) between two neighboring WGS contigs without sequence overlap between the WGS contigs; (3) direct or indirect link between an anchored WGS contig and an unanchored WGS contig; (4) direct or indirect link between two unanchored WGS contigs. Clearly, the positional information on a genetic map has put another restriction which can be used to prioritize the node pairs to be merged, i.e., the closer a node pair on a linkage group, the less chance of error can occur when connecting them. For example, a direct link is generally more reliable than an indirect link, and the links involving anchored contigs are generally more reliable than those not.

Compared with randomly connecting two nodes with a fosmid link between them, we can see that by utilizing the restrictions that fosmid contigs and genetic map put on the overlap graph, the success rate of connecting two truly adjacent WGS contigs will be increased significantly. We minimized the connection errors by observing the following rules: (1) non-redundancy rule, i.e. a WGS contig is used only once; the used contig (and all its links from the used end to the same linkage group and all links to different linkage groups) is removed to reduce conflicts; (2) global best-match-first rule, i.e., the best-scored link (in all linkage groups) is merged first; (3) delayed conflict-resolving rule, i.e., if a contig end overlaps with more than one WGS contigs with the same score, first anchored nodes, then nodes with direct links are merged first; otherwise the connection is delayed to next step; (4) decreasing and minimum overlap threshold rule, i.e., a sequence overlap cannot be shorter than 5 kb with a minimum alignment identity of 97% and three level of identity threshold (99%, 98% and 97%) are used in turn to merge the nodes satisfying each threshold. No nodes from the different linkage groups can be merged except the split part from chimeric contigs.

On the overlap graph constructed using PBcR HS contigs, we found that the average edge number between the nodes on the path of the final super-contigs was 29, while the average edge number for all other connected node pairs being merely 2. As a comparison, the average edge number between the nodes (contigs) adjacent on hybrid genome maps was 27, and the average edge number between other contigs on hybrid maps was also 2. Totally 81% of the gaps in hybrid maps can be connected by one fosmid contig. These results indicated that the fosmid contigs are mostly correctly assembled with a small number of random chimeric ones which did not affect the quality of the connecting regions.

Initially we used the PBcR LS contigs to build super-contigs since the genetic map was constructed using LS contigs. However, after several iterations when no more neighboring contigs (or super-contigs) could be connected, we found that the unfilled

---

gaps between adjacent contigs (or super-contigs) were either located in the centromere regions or resulted from misassembled LS contigs around the gaps. For the latter case, we found that those gaps could be successfully filled after replacing the PBcR LS sequences around the gaps with the best matched HS contigs. Therefore, we redid the whole connection process by aligning the HS contigs onto the constructed LS super-contigs to group and order them (to form anchored and unanchored HS contig sets) and using the fosmid contigs to connect them. In the final HS super-contigs, no unfilled gaps were left due to misassembled contigs. The replacement of PBcR LS contigs with HS contigs also added a few Mb of sequences into the final super-contigs which included several more telomeres. These results suggested that although the LS assembly had higher N50 size but it contained many errors not existing in the HS assembly which was more accurate for the final assembly.

### **Supplementary Note 2: Quality assessment of the WGS assemblies and the connecting regions**

Based on the best aligned blocks of the assembled WGS contigs to the pseudomolecules, we computed the following metrics to evaluate the quality of the WGS assemblies: sensitivity (length percentage of genome being covered by WGS contigs), redundancy ((total aligned length of WGS contigs – covered genome length) / covered genome length) and error rate (total overhang length of >1 kb of aligned WGS contigs / total aligned length of WGS contigs) (Supplementary Table 5). The PBcR HS assembly had the highest sensitivity (99.75%), the highest redundancy (15.86%) and the lowest error rate (0.57%). The high sequence redundancy and low error rate in the PBcR assembly suggested that it generated multiple copies of sequences in repetitive (or heterozygous) regions (Supplementary Fig. 5), which represented a general feature of overlap-layout-consensus (OLC) assemblers<sup>1</sup>, such as Celera in PBcR. On the other hand, string graph assemblers such as Falcon do not usually keep repetitive sequences at the end of assembled contigs<sup>1</sup>. These results suggested that the PBcR HS contigs were very suitable for building super-contigs under the guidance of a genetic map or genome map.

The PBcR HS contigs covered 98.34% of the connecting regions with identity  $\geq 98\%$ , indicating that most of the connecting sequences were present in HS assembly, but in short contigs with N50 size of 24 kb. The Illumina short reads covered 98.02% of the connecting regions (with sequencing depth of 109x) with identity  $\geq 98\%$ . As a comparison, the whole genome coverage and sequencing depth from Illumina short reads was 99.88% and 89x. The high sequencing depth in the connecting regions suggested that they were unlikely to be misassembled at base level. If misassembled, the low quality regions should have much lower sequencing depth or sequencing coverage (see Supplementary Fig. 7). Illumina platform cannot sequence many GC-biased regions. The total number of zero mapping regions by Illumina short reads were 4,751 (a total of 486,331 bp), with max length of 10,170 bp. Since these regions

---

are shorter than the read length of SMRT sequences, they were very unlikely caused by misassemblies.

### **Supplementary Note 3: Estimation of R498 genome size**

The aligned raw SMRT reads to pseudomolecules was 98.54%, covering 99.99% of the genome. After PBcR self-correction, we obtained 16.2 Gb of corrected sequences, of which 99.94% were aligned to the final pseudomolecules with BWA-mem default parameters. After filtering out microbial/human DNA, and mtDNA/cpDNA from the corrected DNA (including unmapped sequences), 15.5 Gb (95.84%, 39x genome coverage) were left for estimating the R498 genome size using the following equation:

$$G = (N \times (L - K + 1) - B) / D.$$

Where N is the total number of reads, L is the average length of reads, K is k-mer length, B is the number of error kmers between zero and the dip before the hump to be discarded, D is the sequencing depth (hump) estimated from k-mer distribution, and G is the genome size.

Using 17-31 mers, the genome size was estimated to be 372.3-385.8 Mb, which was smaller than the assembled pseudomolecules. The discrepancy was caused by the inaccuracy of the equation in estimating the size of genomes with a large amount of high-copy repetitive sequences.

A total of 1 Mb of sequences was found potentially missing in the pseudomolecule regions that were covered by the genome maps, and 3 Mb centromere sequences were not incorporated into the pseudomolecules. Since the genome maps covered 96.6% of the pseudomolecules, the missing sequences throughout the genome except the centromere regions should be not much larger than 1 Mb. Considering the high redundancy (>15%) in PBcR HS assembly, we estimated the true missing centromere sequences probably to be <2.5 Mb. Meanwhile, we used the Illumina short reads to estimate the centromere gap size<sup>2</sup>. After alignment with BWA-mem, only one best aligned position was selected for each read, and the sequencing depth for each window of 1 kb was computed. Based on the ratio of the normalized average sequencing depth of centromere regions to the whole genome, we estimated the total size of the five centromere gaps to be 1.9 Mb.

Put them together, we estimated that <3.5 Mb (<1%) of sequences were missing in the pseudomolecules. In addition, we assembled the 38.7 Gb of Illumina short read data to 477 Mb contig sequences by SOAPdenovo (Supplementary Table 2), of which 466.2 Mb (97.74%) were aligned to the R498 pseudomolecules. It is notable that SOAPdenovo generated very few chimeric contigs, though with high sequence redundancy. After removing contaminated sequences from microbial and human genomes, only less than 1.0 Mb of non-redundant sequences were not aligned to the pseudomolecules.

---

### Supplementary References

1. Chaisson, M. J. P., Wilson, R. K. & Eichler, E. E. Genetic variation and the de novo assembly of human genomes. *Nat. Rev. Genet.* **16**, 627–640 (2015).
2. Long, Q. *et al.* Massive genomic variation and strong selection in *Arabidopsis thaliana* lines from Sweden. *Nat. Genet.* **45**, 884–890 (2013).
